# Supplementary material for: Inequality in the distribution of ear, nose and throat specialists in 15 Latin American countries: an ecological study
Source: PubMed Central journal article supplement — BMJ Open. 2019 Jul 19;9(7):e030220. doi: 10.1136/bmjopen-2019-030220 (PMC6661698; doi:10.1136/bmjopen-2019-030220), 2019-07-19

# BMJ Open

BMJ Open is committed to open peer review. As part of this commitment we make the peer review history of every article we publish publicly available.

When an article is published we post the peer reviewers' comments and the authors' responses online. We also post the versions of the paper that were used during peer review. These are the versions that the peer review comments apply to.

The versions of the paper that follow are the versions that were submitted during the peer review process. They are not the versions of record or the final published versions. They should not be cited or distributed as the published version of this manuscript.

BMJ Open is an open access journal and the full, final, typeset and author-corrected version of record of the manuscript is available on our site with no access controls, subscription charges or pay-per-view fees (<http://bmjopen.bmj.com>).

If you have any questions on BMJ Open's open peer review process please email [info.bmjopen@bmj.com](mailto:info.bmjopen@bmj.com)

# BMJ Open

## Inequality in the distribution of Ear Nose and Throat specialists in 15 Latin American countries

|                               |                                                                                                                                                                                                                                                                                                                                                                                                                                                                                                                                                                                                                                                                                                                                                                                                                                                                                      |
|-------------------------------|--------------------------------------------------------------------------------------------------------------------------------------------------------------------------------------------------------------------------------------------------------------------------------------------------------------------------------------------------------------------------------------------------------------------------------------------------------------------------------------------------------------------------------------------------------------------------------------------------------------------------------------------------------------------------------------------------------------------------------------------------------------------------------------------------------------------------------------------------------------------------------------|
| Journal:                      | <i>BMJ Open</i>                                                                                                                                                                                                                                                                                                                                                                                                                                                                                                                                                                                                                                                                                                                                                                                                                                                                      |
| Manuscript ID                 | bmjopen-2019-030220                                                                                                                                                                                                                                                                                                                                                                                                                                                                                                                                                                                                                                                                                                                                                                                                                                                                  |
| Article Type:                 | Research                                                                                                                                                                                                                                                                                                                                                                                                                                                                                                                                                                                                                                                                                                                                                                                                                                                                             |
| Date Submitted by the Author: | 05-Mar-2019                                                                                                                                                                                                                                                                                                                                                                                                                                                                                                                                                                                                                                                                                                                                                                                                                                                                          |
| Complete List of Authors:     | Bright, Tess; London School of Hygiene & Tropical Medicine, CRD<br>Mújica, Oscar; Pan American Health Organization, PAHO/WHO,<br>Intelligence for Action in Health<br>Ramke, Jacqueline; LSHTM,<br>Moreno, Claudia; Pan American Health Organization<br>Der, Carolina ; Clínica Alemana de Santiago, Facultad de Medicina<br>Universidad del Desarrollo<br>Melendez, Amarilis; Hospital Santo Tomas<br>Lara Ovaes, Ericka; University of Minnesota , School of Public Health<br>Sandoval Domingues, Edgar; Instituto de Seguridad y Servicios Sociales<br>de los Trabajadores del Estado<br>Santana Hernandez, Diego Jose; CBM Christoffel-Blindenmission<br>Chadha, Shelly; The World Health Organization , WHO Programme for<br>Prevention of Deafness and Hearing Loss<br>Silva, Juan Carlos; Pan American Health Organization<br>Penaranda, Augusto; Fundacion Santafe de Bogota |
| Keywords:                     | Health policy < HEALTH SERVICES ADMINISTRATION & MANAGEMENT,<br>Organisation of health services < HEALTH SERVICES ADMINISTRATION<br>& MANAGEMENT, OTOLARYNGOLOGY, Health equity                                                                                                                                                                                                                                                                                                                                                                                                                                                                                                                                                                                                                                                                                                      |
|                               |                                                                                                                                                                                                                                                                                                                                                                                                                                                                                                                                                                                                                                                                                                                                                                                                                                                                                      |

SCHOLARONE™  
Manuscripts

1  
2  
3 1 **Title: Inequality in the distribution of Ear Nose and Throat specialists in 15**  
4  
5 2 **Latin American countries**

6  
7 3 **Authors:** Tess Bright<sup>1</sup>, Oscar J Mujica<sup>2</sup>, Jacqueline Ramke<sup>1</sup>, Claudia M Moreno<sup>2</sup>,  
8  
9 4 Carolina Der<sup>3</sup>, Amarilis Melendez<sup>4</sup>, Ericka Lara<sup>5</sup>, Edgar Sandoval<sup>6</sup>, Diego Santana<sup>7</sup>  
10  
11 5 Shelly Chadha<sup>9</sup>, Juan C Silva<sup>2</sup> and Augusto Peñaranda<sup>8</sup>

12  
13 6 **Affiliations**

- 14  
15 7 1) International Centre for Evidence in Disability, London School of Hygiene &  
16  
17 8 Tropical Medicine, Keppel St, London, WC1 E7HT  
18  
19 9 2) Pan American Health Organization, PAHO/WHO, Washington DC USA  
20  
21 10 3) Clínica Alemana de Santiago, Facultad de Medicina Universidad del  
22  
23 11 Desarrollo, Santiago, Chile.  
24  
25 12 4) Hospital Santo Tomas, Ciudad de Panamá, Panamá  
26  
27 13 5) University of Minnesota, School of Public Health, Minneapolis, Minnesota  
28  
29 14 55455, USA  
30  
31 15 6) Instituto de Seguridad y Servicios Sociales de los Trabajadores del Estado,  
32  
33 16 Morelos; México  
34  
35 17 7) CBM Christoffel-Blindenmission Christian Blind Mission e.V Stubenwald Alle  
36  
37 18 5, 64625, Bensheim, Germany  
38  
39 19 8) Interamerican Association of Paediatric Otorhinolaryngology-IAPO.  
40  
41 20 Fundacion Santafe de Bogota, Colombia  
42  
43 21 9) Management of Noncommunicable Diseases, Disability, Violence and Injury  
44  
45 22 Prevention, World Health Organization, avenue Appia 20, 1211 Geneva 27,  
46  
47 23 Switzerland  
48  
49  
50  
51  
52  
53  
54  
55  
56  
57  
58  
59  
60

25 **Corresponding author:** Jacqueline Ramke [Jacqueline.Ramke@lshtm.ac.uk](mailto:Jacqueline.Ramke@lshtm.ac.uk)

## 1 **Abstract**

2 **Objective:** To explore socio-geographic inequalities in the availability and  
3 distribution of Ear Nose and Throat specialists (ENTs) in 15 Latin American (LA)  
4 countries.

5 **Design:** Ecological

6 **Setting:** Spanish and Portuguese speaking countries of Latin America

7 The number of registered ENTs in 2017 were obtained from the National ENT  
8 Society in each country.

9 **Outcome measures:** The ENT rate/million population was calculated at the national  
10 and sub-national (e.g. state) level. Three measures were calculated to assess sub-  
11 national distributive inequality of ENTs: i) absolute and ii) relative index of  
12 dissimilarity; and iii) concentration index (using the Human Development Index as  
13 the equity stratifier). Finally, the ratio of ENTs/million population in the capital area  
14 compared to the rest of the country was calculated.

15 **Results:** There was a more than a 30-fold difference in the number of ENTs/million  
16 population across the included countries—from 61.0 in Argentina (95% Confidence  
17 Interval (CI) 58.7–63.4) to 2.8 in Guatemala (95%CI 2.1–3.8). In all countries ENTs  
18 were more prevalent in advantaged areas and in capital areas. To attain distributive  
19 equality, Paraguay would need to redistribute the greatest proportion of its ENT  
20 workforce (67.3%; 95%CI 57.8–75.6) and Brazil the least (18.5%; 95%CI 17.6–19.5).

21 **Conclusions:** There is high inequality in the number and distribution of ENTs  
22 between and within the 15 studied countries in Latin America. This evidence can be  
23 used to inform policies that improve access to ear and hearing services in the region,  
24 such as scale-up of training of ENTs and incentives to distribute specialists equally.  
25 These actions to reduce inequities, alongside addressing the social determinants of  
26 ear and hearing health, are essential to realise Universal Health Coverage.

27

### 1 **Strengths and limitations of this study**

- 2 • This is the first regional-level analysis on the availability and distribution of ENT  
3 specialists in Latin America, and includes 15 of the 19 Spanish or Portuguese-  
4 speaking countries.
- 5 • The three inequality measures used to assess subnational inequality—the  
6 relative concentration index, the absolute index of dissimilarity and the relative  
7 index of dissimilarity—take into account the entire population and are population-  
8 weighted, thus giving equal weight to each individual's access to ENTs.
- 9 • The data were obtained from national ENT societies, which may not be  
10 representative of all available ENTs, as some ENTs may not be society-affiliated.
- 11 • Data were not available on the distribution of ENTs in private vs public health  
12 services. Consequently, our results may overestimate the availability of ENTs for  
13 people without the resources to access the private sector.

## 1 Introduction

2 In 2018 there was an estimated 466 million people with disabling hearing loss, and  
3 over 80% of these reside in low and middle income countries (LMICs).<sup>1</sup> The World  
4 Health Organization (WHO) has estimated that by 2050 one in ten, or 900 million  
5 people, will experience disabling hearing loss unless substantial public health  
6 measures are implemented.<sup>1</sup> The predicted increase in prevalence can be attributed  
7 to the expected rise in global population, and global ageing.<sup>1</sup>

8 Consequently, there is a need for ear and hearing services, including surgical (e.g.  
9 Ear Nose and Throat specialists (ENTs)) and rehabilitative services (e.g.  
10 audiologists, and speech therapists), to meet the increasing demand. Indeed, in  
11 order to achieve Universal Health Coverage (UHC) for the millions of people with  
12 hearing loss globally, equitable access to effective, high quality and affordable ear  
13 and hearing services is vital. However, access to these services is extremely low in  
14 LMICs,<sup>2</sup> due to a dearth of human resources.<sup>3,4</sup>

15 Latin America (LA) has a combined population of 600 million people, approximately  
16 42 million (7%) of whom are estimated to have disabling hearing loss.<sup>1,5</sup> Countries  
17 within LA are highly diverse in terms of their historical, economic, political, and  
18 sociocultural contexts.<sup>6</sup> As an example, the GDP per capita in Chile is \$15,346, more  
19 than three times as much as Guatemala (\$4,470).<sup>6,7</sup> These vast economic  
20 differences have shaped health systems reforms in the region and efforts to achieve  
21 UHC.<sup>6,8</sup> As a consequence, countries in the region show variation in terms of human  
22 resource shortages for health care.<sup>9</sup> Previous research has found substantial  
23 shortages in the number of ENTs in 50% of LA countries.<sup>10</sup> Other professionals  
24 involved in ear and hearing care services, such as audiologists and speech therapists,  
25 are in even shorter supply.<sup>11</sup> There is also some evidence that within countries,  
26 ENTs are unequally distributed, with a higher concentration in urban compared to  
27 rural areas.<sup>12</sup> However, these inequities have not been examined in depth.

28 This study aimed to explore socio-geographic inequalities in the availability and  
29 distribution of ENTs both within and between 15 LA countries. The study  
30 hypothesised that regional variation in the availability of ENT specialists per million  
31 population exists. Within countries, ENT specialists were hypothesised to be

1  
2  
3 1 unequally distributed across sub-national regions, with the majority concentrated in  
4 2 areas of higher human development.

### 3 **Methods**

4 This is an ecological study that assesses the distributive inequality of ENT specialists  
5 in 15 countries in LA using standard measures of disproportionality across sub-  
6 national social gradients (defined by Human Development Indices). Ethical approval  
7 was not sought for this study, which used publicly available population data with  
8 organisational practitioner data.

### 9 **Data sources**

#### 10 *Population*

11 This paper focuses on the Spanish and Portuguese speaking countries of LA, of  
12 which there are 17. All LA countries were invited to participate, and 15 responded.  
13 The 15 included countries consist of 294 first-order sub-national units (e.g.  
14 department, province, state). Population data for these units were obtained from the  
15 national institutes of census and statistics of each country. The combined population  
16 of the included countries represent 96.7% of people in the LA Spanish and  
17 Portuguese speaking countries, and 88.2% of the total Latin America and the  
18 Caribbean regional population in 2017.<sup>13</sup>

#### 19 *Personnel*

20 Although ENT specialists alone do not capture the full complement of ear and  
21 hearing services necessary to treat and manage hearing loss, they were chosen as a  
22 key indicator to measure inequalities in access to ear and hearing services. An “ENT  
23 specialist” is defined for the purposes of this paper as a medical doctor who has  
24 been trained in the management of ear, nose and throat conditions, through a  
25 recognised degree.<sup>4</sup> Hereafter we refer to ENT specialists as ENTs.

26 In each country, data on the number ENTs registered at each of the sub-national  
27 units in 2017 were obtained from the National Society of ENTs. Societies were  
28 contacted by the Interamerican Association of Paediatric Otorhinolaryngology-IAPO  
29 or study authors, either by phone or email. Society membership requires a medical

1 degree, completion of residency at an accredited medical school, and a national  
2 practice license.

### 3 *Human Development Index*

4 The Human Development Index (HDI) was used as the equity stratifier of the sub-  
5 national units. The HDI is widely used by the United Nations Development  
6 Programme as a composite measure of achievement in three key dimensions of  
7 human development—health, education, and standard of living.<sup>14</sup> The HDI score is a  
8 value between zero and one which represents the geometric mean of the index of  
9 the three dimensions.<sup>14</sup> The most recent HDI for the sub-national units of each  
10 country were obtained from UNDP reports from each country. To create the social  
11 gradient, within each country, sub-national units were ordered from lowest HDI (most  
12 socially disadvantaged) to highest HDI (most socially advantaged).

## 13 **Analysis**

### 14 *Availability of ENT personnel*

15 The number of ENTs/million population was calculated for each sub-national unit of  
16 each country. The mean and 95% confidence interval (CI) of ENTs/million population  
17 at the national level were calculated.

### 18 *Inequality measures*

19 Inequality in the distribution of ENTs was assessed using three common indicators of  
20 health inequality<sup>15,16,17</sup>:

- 21 • Relative concentration index (RCI)

22 The RCI is a relative measure of gradient inequality that indicates the extent to  
23 which a health indicator is concentrated among the disadvantaged or the  
24 advantaged.<sup>17</sup> In this analysis the RCI measures the extent to which the ENT  
25 distribution across sub-national units is systematically associated with the social  
26 advantage of each sub-national unit (measured by HDI). RCI takes a value between  
27 -1 and 1, with 0 indicating no inequality (i.e., equal distribution). A negative value of  
28 RCI indicates ENTs are concentrated among more disadvantaged sub-national  
29 units, and a positive value indicates ENTs are concentrated among more advantaged  
30 sub-national units.



1  
2  
3 1 The RCI was calculated for each country using non-linear optimization to fit a  
4 Lorenz concentration curve and calculating the area under the curve.<sup>18</sup> The  
5 2 curve equation fit the observed cumulative proportion of the population (as  
6 3 ranked by the HDI of each sub-national unit) against the cumulative proportion of  
7 4 ENTs.  
8 5

9  
10  
11  
12 6 • Absolute index of dissimilarity (aID)

13  
14 7 The aID quantifies the number of ENTs within a given country who would need to  
15 8 be redistributed for the national rate of ENTs/million population to be achieved in  
16 9 each sub-national unit i.e. equitable distribution. The aID is half the sum of the  
17 10 absolute value of the differences between the national average ENTs and the  
18 11 number of ENTs observed in each unit.

19  
20  
21  
22  
23 12 • Relative index of dissimilarity (rID)

24  
25 13 The rID is the relative equivalent of the aID, representing the percentage of ENTs  
26 14 who would have to be redistributed to achieve equitable sub-national distribution.  
27 15 The rID is computed by dividing the aID by the total number of ENTs  
28 16 available.<sup>15,18</sup> The closer rID is to 100%, the greater the inequality.  
29  
30  
31  
32  
33

34 18 *Regional benchmarking*

35  
36 19 WHO recommends benchmarking within regions to understand one country's level of  
37 20 inequality in relation to others.<sup>17</sup> To benchmark ENT distribution in LA we calculated  
38 21 the regional weighted mean of ENTs/million population and the regional distributional  
39 22 inequality (measured by the RCI). We used these regional averages to construct a  
40 23 framework<sup>19</sup> with four quadrants and mapped each country based on whether its  
41 24 ENT rate and RCI were higher or lower than the regional average. The HDI level of  
42 25 each country<sup>20</sup> was also indicated.  
43  
44  
45  
46  
47  
48

49 26 *Urban concentration*

50  
51 27 To assess the extent of urban concentration of ENTs, the ENTs/million population in  
52 28 the capital area for each country (i.e. the sub-national unit that contains the  
53 29 constitutional capital or the seat of government city), as compared to the rate in the  
54 30 rest of the country combined (i.e. all sub-national units apart from the capital area).  
55 31 The ratio of ENTs/million population in the capital compared to the rest of the country  
56 32 was calculated.  
57  
58  
59  
60

1  
2  
3  
4 1  
5 2 All statistical analyses were performed in MS Excel Solver and ToolPak add-ins  
6 3 (Microsoft Corp., Redmond, Washington, USA), using a semiautomated analytical  
7 4 template tool developed by the Pan American Health Organization (PAHO) for  
8 5 exploratory data analysis of social inequalities in health. Uncertainty was ascertained  
9 6 by computing 95% CIs for all summary measures of health inequality as well as the  
10 7 mean number of ENTs/million population.  
11  
12  
13  
14  
15  
16 8

## 17 18 9 **Results**

### 19 20 21 10 *Between country inequality*

22  
23 11 In these 15 LA countries, there was large variation in the size of the ENT profession,  
24 12 the rate of ENTs/million population and the distributive inequality (Table 1). For  
25 13 example, Brazil had 6,159 registered ENTs while Nicaragua had only 38. When the  
26 14 population size was taken into account, there was a more than a 30-fold difference in  
27 15 the number of ENTs/million population—from 61.0 in Argentina (95%CI 58.7–63.4) to  
28 16 2.8 in Guatemala (95%CI 2.1–3.8) (Table 1). There was also large variation in  
29 17 distributive inequality. In all countries ENTs were more prevalent in advantaged  
30 18 areas but the extent of this inequality varied greatly—inequality was lowest in Brazil  
31 19 (RCI 0.249; 95%CI 0.133–0.365) and highest in Paraguay (RCI 0.819; 95%CI  
32 20 0.769–0.870) (supplementary figure 1).  
33  
34  
35  
36  
37  
38  
39  
40

### 41 21 Regional benchmarking

42  
43 22 The regional variation in the ENT rate and distributive inequality is depicted in Figure  
44 23 1. The high ENT rate in Argentina—more than twice as high as the rate in the next  
45 24 highest country—inflated the regional weighted mean of 24.5/million (95%CI 23.3–  
46 25 25.7) (Figure 1). Brazil and Chile were the only other countries to have an ENT rate  
47 26 higher than the regional average. These three countries also had lower distributive  
48 27 inequality than the regional average (RCI 0.344; 95%CI 0.227–0.460), placing them  
49 28 in the best performing, top left quadrant of Figure 1. In contrast, the countries in the  
50 29 bottom right quadrant had a lower ENT rate and higher inequality compared to the  
51 30 regional average, with Guatemala arguably furthest behind other countries in the  
52 31 region.  
53  
54  
55  
56  
57  
58  
59  
60

1  
2  
3 1 The ENT rate tended to reflect the national HDI level. Countries with very high HDI  
4 had the highest ENT rate, followed by countries with high HDI, and then countries  
5 with medium HDI tending to have the lowest ENT rate. Distributive inequality was  
6 similar with two exceptions—Paraguay and Panama are high HDI countries but had  
7 distributive inequality more equivalent to countries of medium HDI (Figure 1).  
8  
9  
10  
11  
12

### 13 *Within country inequality*

14  
15 7 The redistributive potential to achieve equality mirrored the RCI results, with Brazil  
16 needing to redistribute the lowest proportion of their ENTs to achieve distributive  
17 equality (rID 18.5%; 95%CI 17.6–19.5) and Paraguay the highest (rID 67.3%; 95%CI  
18 57.8–75.6) (Table 1). Due to the size of the respective workforce, this equates to  
19 redistributing 1,142 ENTs in Brazil and 70 in Paraguay (aID; Table 1).  
20  
21  
22  
23

### 24 Urban concentration

25  
26  
27 13 In all countries, even when the population size was taken into account, ENTs were more  
28 concentrated in capital areas (Table 2). Argentina fared best, but the ENT rate in the  
29 capital area remained over twice as high as the rest of the country (C:R ratio 2.3; 95%  
30 CI 2.1–2.5).  
31  
32  
33

34 17 The largest inequality between capital and other areas was seen in Paraguay (C:R ratio  
35 36.7; 95%CI 23.6–57.2), Venezuela (C:R ratio 15.2; 95%CI 12.9–17.9) and Panama  
36 (C:R ratio 15.1; 95%CI 4.7–48.5). The high C:R inequality observed in Paraguay and  
37 Venezuela was driven by high ENT rates in the capital. In turn, these rates were driven  
38 by the low proportion of the national population residing in the capital area (7.6% and  
39 6.6% respectively), combined with the majority of ENTs being located there (75.0% and  
40 51.9% respectively). In contrast, the high C:R inequality in Panama was driven by the  
41 very low ENT rates in the rest of the country, with only three of the country's 53 ENTs  
42 (5.7%) stationed outside the capital (Table 2).  
43  
44  
45  
46  
47  
48  
49  
50  
51  
52  
53  
54  
55  
56  
57  
58  
59  
60

26

1 **Table 1:** Distributive inequality of ENTs per million population in 15 Latin American countries, 2017

| Country       | Population <sup>a</sup> | Number of ENTs <sup>b</sup> | Number of sub-national units (e.g. states) <sup>a</sup> | ENTs per million population |           | Concentration index |              |   | Absolute index of dissimilarity |             | Relative index of dissimilarity |           |
|---------------|-------------------------|-----------------------------|---------------------------------------------------------|-----------------------------|-----------|---------------------|--------------|---|---------------------------------|-------------|---------------------------------|-----------|
|               |                         |                             |                                                         | Mean                        | 95%CI     | Mean                | 95%CI        | † | Mean                            | 95%CI       | Mean (%)                        | 95%CI     |
| Argentina     | 44,044,811              | 2,688                       | 23                                                      | 61.0                        | 58.7-63.4 | 0.259               | 0.128-0.391  | † | 575                             | 534-618     | 21.4                            | 19.9-23.0 |
| Bolivia       | 11,145,770              | 130                         | 9                                                       | 11.7                        | 9.7-13.8  | 0.686               | 0.507-0.864  | † | 75                              | 64-86       | 57.7                            | 49.1-65.8 |
| Brazil        | 207,660,929             | 6,159                       | 27                                                      | 29.7                        | 28.9-30.4 | 0.249               | 0.133-0.365  | † | 1,142                           | 1,083-1,203 | 18.5                            | 17.6-19.5 |
| Chile         | 17,598,287              | 461                         | 13                                                      | 26.2                        | 23.9-28.7 | 0.287               | 0.058-0.517  | † | 115                             | 98-134      | 24.9                            | 21.2-29.1 |
| Colombia      | 49,291,609              | 584                         | 33                                                      | 11.8                        | 10.9-12.8 | 0.349               | 0.262-0.437  | † | 155                             | 135-177     | 26.5                            | 23.1-30.3 |
| Costa Rica    | 4,947,481               | 103                         | 7                                                       | 20.8                        | 17.0-25.2 | 0.334               | -0.065-0.732 | † | 35                              | 26-45       | 34.0                            | 25.6-43.6 |
| El Salvador   | 6,581,940               | 59                          | 14                                                      | 9.0                         | 6.8-11.6  | 0.670               | 0.546-0.794  | † | 34                              | 27-41       | 57.6                            | 44.9-69.4 |
| Guatemala     | 16,924,191              | 48                          | 22                                                      | 2.8                         | 2.1-3.8   | 0.782               | 0.749-0.816  | † | 32                              | 25-38       | 66.7                            | 52.5-78.3 |
| Honduras      | 8,866,351               | 71                          | 18                                                      | 8.0                         | 6.3-10.1  | 0.570               | 0.441-0.699  | † | 36                              | 28-44       | 50.7                            | 39.3-62.0 |
| Mexico        | 124,041,731             | 2,207                       | 32                                                      | 17.8                        | 17.1-18.6 | 0.336               | 0.238-0.433  | † | 631                             | 590-673     | 28.6                            | 26.7-30.5 |
| Nicaragua     | 6,262,703               | 38                          | 17                                                      | 6.1                         | 4.3-8.3   | 0.442               | 0.291-0.593  | † | 16                              | 11-22       | 42.1                            | 27.9-57.8 |
| Panama        | 4,098,135               | 53                          | 12                                                      | 12.9                        | 9.7-16.9  | 0.651               | 0.564-0.738  | † | 22                              | 16-29       | 41.5                            | 29.3-54.9 |
| Paraguay      | 6,941,905               | 104                         | 18                                                      | 15.0                        | 12.2-18.2 | 0.819               | 0.769-0.870  | † | 70                              | 60-79       | 67.3                            | 57.8-75.6 |
| Peru          | 29,381,884              | 646                         | 25                                                      | 22.0                        | 20.3-23.7 | 0.385               | 0.276-0.494  | † | 213                             | 190-237     | 33.0                            | 29.5-36.7 |
| Venezuela     | 31,428,916              | 580                         | 24                                                      | 18.5                        | 17.0-20.0 | 0.446               | 0.307-0.586  | † | 275                             | 252-299     | 47.4                            | 43.4-51.5 |
| All countries | 569,216,643             | 13,931                      | 294                                                     | 24.5                        | 23.3-25.7 | 0.344               | 0.227-0.460  | † | 3,426                           | 3,139-3,725 | 28.5                            | 25.5-31.5 |

2 *ENT: Ear nose and throat specialist*3 *a Source: National Institute of Statistics      b Source: National Society of ENTs*

1 **Table 2:** Number of ENTs per million population in the capital area compared to the rest of the country in 15 Latin American countries, 2017

| Country     | ENTs per million population |             |                 |           | Ratio of ENT rate<br>Capital: Rest-of-country<br>(C:R ratio) |           | Proportion of<br>population in<br>Capital area<br>(%) <sup>a</sup> | Proportion of<br>ENTs in Capital<br>area<br>(%) <sup>b</sup> | Capital area description |                              |
|-------------|-----------------------------|-------------|-----------------|-----------|--------------------------------------------------------------|-----------|--------------------------------------------------------------------|--------------------------------------------------------------|--------------------------|------------------------------|
|             | Capital area                |             | Rest-of-country |           | Mean                                                         | 95%CI     |                                                                    |                                                              |                          |                              |
|             | Mean                        | 95%CI       | Mean            | 95%CI     |                                                              |           |                                                                    |                                                              |                          |                              |
| Argentina   | 88.1                        | 84.0-92.3   | 38.4            | 35.9-40.9 | 2.3                                                          | 2.1-2.5   | †                                                                  | 45.6%                                                        | 65.8%                    | Buenos Aires Autonomous City |
| Bolivia     | 37.7                        | 31.0-45.6   | 2.7             | 1.7-4.0   | 14.2                                                         | 9.0-22.5  | †                                                                  | 25.7%                                                        | 83.1%                    | La Paz Department            |
| Brazil      | 67.8                        | 58.8-77.7   | 29.1            | 28.4-29.8 | 2.3                                                          | 2.0-2.7   | †                                                                  | 1.5%                                                         | 3.3%                     | Federal District             |
| Chile       | 42.3                        | 37.7-47.4   | 15.3            | 13.0-17.8 | 2.8                                                          | 2.3-3.4   | †                                                                  | 40.4%                                                        | 65.3%                    | Metropolitan Region          |
| Colombia    | 26.7                        | 23.3-30.5   | 8.9             | 8.0-9.9   | 3.0                                                          | 2.5-3.5   | †                                                                  | 16.4%                                                        | 37.0%                    | Bogota Capital District      |
| Costa Rica  | 42.6                        | 33.1-53.9   | 10.2            | 7.1-14.3  | 4.2                                                          | 2.8-6.3   | †                                                                  | 32.8%                                                        | 67.0%                    | San Jose Province            |
| El Salvador | 28.0                        | 20.8-36.9   | 1.9             | 0.9-3.6   | 14.9                                                         | 7.3-30.3  | †                                                                  | 27.1%                                                        | 84.7%                    | San Salvador Department      |
| Guatemala   | 11.0                        | 7.8-15.1    | 0.7             | 0.4-1.4   | 14.9                                                         | 7.4-29.8  | †                                                                  | 20.4%                                                        | 79.2%                    | Guatemala Department         |
| Honduras    | 24.4                        | 17.3-33.3   | 4.4             | 3.0-6.2   | 5.5                                                          | 3.5-8.8   | †                                                                  | 18.1%                                                        | 54.9%                    | Francisco Morazan Department |
| Mexico      | 65.4                        | 60.3-70.9   | 14.0            | 13.4-14.7 | 4.7                                                          | 4.2-5.1   | †                                                                  | 7.3%                                                         | 26.8%                    | Federal District             |
| Nicaragua   | 14.1                        | 8.8-21.6    | 3.6             | 2.1-5.7   | 4.0                                                          | 2.1-7.5   | †                                                                  | 23.7%                                                        | 55.3%                    | Managua Department           |
| Panama      | 23.3                        | 17.3-30.7   | 1.5             | 0.3-4.5   | 15.1                                                         | 4.7-48.5  | †                                                                  | 52.4%                                                        | 94.3%                    | Panama Province              |
| Paraguay    | 148.8                       | 117.6-185.7 | 4.1             | 2.6-5.9   | 36.7                                                         | 23.6-57.2 | †                                                                  | 7.6%                                                         | 75.0%                    | Asuncion Capital City        |
| Peru        | 36.5                        | 32.7-40.5   | 15.1            | 13.4-16.9 | 2.4                                                          | 2.1-2.8   | †                                                                  | 32.3%                                                        | 53.6%                    | Lima Department              |
| Venezuela   | 144.3                       | 128.5-161.6 | 9.5             | 8.4-10.7  | 15.2                                                         | 12.9-17.9 | †                                                                  | 6.6%                                                         | 51.9%                    | Capital District             |

2 *ENT: Ear nose and throat specialist*3 *a Source: National Institute of Statistics      b Source: National Society of ENTs*4 *†statistically significant departure from equality (i.e. statistically different from zero) at p<0.05 level*

## 1 Discussion

2 This study examined the socio-geographic distribution of ENTs between and within  
3 15 LA countries. We found that the availability of ENTs across countries of the region  
4 is highly variable. Within countries, the distribution was shown to be unequal, with  
5 more socially advantaged areas, and capital areas, having a higher concentration of  
6 ENT specialists. Despite inequality in countries such as Argentina, Brazil and Chile  
7 being up to three times lower than Paraguay and Guatemala, the RCI in all 15  
8 countries was at a level WHO considers a high level of relative inequality.<sup>17</sup> This high  
9 inequality was reinforced by the rID, which indicates between one in five ENTs in  
10 Brazil and two in three ENTs in Paraguay would need to be redistributed to attain  
11 socio-geographic equality.

12 The findings of this study concur with previous literature from both the LA region and  
13 elsewhere. Wagner et al. (2013) and Stolovitsy et al. (2018) also found that  
14 Guatemala had the poorest ratio of ENTs/100,000 population (4 per million), which  
15 was only 11% of the ratio in the United States.<sup>10,12</sup> Both studies also found the  
16 highest ratio was in Argentina (56 per million). These trends align with our findings,  
17 however we found a lower ratio in Guatemala and higher ratio in Argentina which  
18 may be explained by population increases, or increases in the numbers of ENTs  
19 respectively.<sup>10,12</sup> In 2001, Madriz and colleagues surveyed 15 Latin American and  
20 the Caribbean countries to determine the resources available for hearing impairment,  
21 including prevalence data, training programmes, and equipment. They found Brazil  
22 (5000 ENTs), Argentina (3000 ENTs), and Mexico (2400 ENTs) had the greatest  
23 absolute numbers of human resources. Although the survey was published over 15  
24 years ago, it appears that there has been little progress in human resource  
25 development since this study was conducted.<sup>11</sup> In fact, the number of ENTs in our  
26 study was lower in comparison for Argentina, Guatemala, and Mexico. This may be  
27 due to differences in data sources, with the 2001 survey using expert opinion across  
28 a range of institutions rather than National societal membership.<sup>11</sup> In 2012, the WHO  
29 conducted a global survey of availability of human resources to provide ear and  
30 hearing care. They demonstrated great variation in availability of ENTs, audiologists,  
31 and speech therapists globally, and a clear trend of increased availability with  
32 country-income group.<sup>4</sup>

1  
2  
3 1 Despite the trend in increased availability with national income, inequalities in access  
4 2 to services still exist within countries. Within country disparities in availability of ENTs  
5 3 have been less well documented. Westerburg et al. (2018) reports that the  
6 4 geographic distribution of ENTs in North America is inequitable, contributing to poor  
7 5 access for vulnerable populations.<sup>21</sup> In Canada, for example, the majority of  
8 6 providers are located in urban centres, and there are no providers at all in many  
9 7 areas where Aboriginal populations are concentrated.<sup>21</sup> The trends we found in this  
10 8 study have also been observed in eye health. Hong et al. (2016) found that  
11 9 ophthalmologists are more concentrated in socially advantaged areas within  
12 10 countries.<sup>22</sup> However, comparisons to this study highlight that the low coverage of  
13 11 ENTs appears to be more pronounced than in eye health. For example in  
14 12 Venezuela, there are 42 ophthalmologists/million, whereas our analysis found a ratio  
15 13 of 18.5 ENTs/million. Thus, for every ENT in Venezuela there are two  
16 14 ophthalmologists. This is despite comparable burden of impairments (16%  
17 15 hearing; 18% vision).<sup>23</sup> The reasons for this difference could allow lessons to be  
18 16 drawn on improving ear and hearing services availability in the country. Compared to  
19 17 ophthalmologists, ENTs in LA also tend to be less equally distributed. There are  
20 18 several possible explanations for this, including the lack of population-based data on  
21 19 need for services, and lack of funding, leading to ear and hearing care not being  
22 20 prioritised by the regional governments.<sup>24</sup>

23 21 This study has several strengths. Although previous literature has examined  
24 22 numbers of ENTs per population and made comparisons across countries, there has  
25 23 been limited analysis of inequalities within countries. This study adds to the  
26 24 knowledge base by performing a robust, more in-depth analysis of the substantial  
27 25 sub-national inequalities that exist. The three inequality measures used in this  
28 26 analysis take into account the entire population and are population-weighted, thus  
29 27 giving equal weight to each individual's access to ENTs.<sup>16,25</sup> These strengths—along  
30 28 with reflecting the socioeconomic dimension to health inequality—are why WHO  
31 29 recommends the concentration index as a measure of relative inequality.<sup>26</sup> The data  
32 30 coverage of this study was high, representing 96.7% of the LA Spanish and  
33 31 Portuguese speaking countries.

32 32 There are also limitations which should be taken in to account when interpreting the  
33 33 results. The data were obtained from national ENT societies, which may not be

1  
2  
3 1 representative of all available ENTs within the countries studied as some ENTs may  
4 not be society-affiliated. Although ENT specialists are an essential component of  
5 2 functioning ear and hearing care programmes, there are also many other  
6 3 professionals involved in provision of specialist care for hearing loss and ear  
7 4 disease, for instance, audiologists and speech therapists. Further, data on the  
8 5 availability of equipment to enable service provision is not provided. The data also  
9 6 does not capture more nuanced service delivery models common in LMIC, such as  
10 7 surgical outreach to primary and secondary care facilities or telemedicine. This is an  
11 8 area of future research need. Finally, data were not available on the distribution of  
12 9 ENTs in private vs public health services which has an impact on the financial  
13 10 accessibility of the service. Thus, we are unable to draw conclusions on the  
14 11 availability full complement of ear and hearing services. We are also unable to  
15 12 comment on the quality and costs of service provision, which are important  
16 13 components of UHC.<sup>27</sup>

17 15 This study provides evidence for policy makers to further develop programmes that  
18 16 increase the number of ENTs/million population as well as reduce the inequities in  
19 17 their distribution. The Pan American Health Organisation (PAHO), the regional WHO  
20 18 office for the Americas, has developed a strategy to guide national policies on  
21 19 addressing human resource deficiencies.<sup>28</sup> Some of the key strategies outlined  
22 20 include strengthening governance and leadership, focussing on the number and  
23 21 distribution of personnel according to health needs; partnership with other relevant  
24 22 sectors, such as education, in order to respond to training needs across geographic  
25 23 regions; and implementing staff retention strategies, such as incentives and  
26 24 improved infrastructure.<sup>28</sup> Access to health is required to achieve good health  
27 25 outcomes, however in addressing health inequities, actions must also be taken to  
28 26 address the social determinants of health. As an example, hearing loss and ear  
29 27 disease are linked to poverty, and thus to address the greater burden amongst the  
30 28 poor, a multi-faceted approach is required – beyond a focus on human resource  
31 29 development alone.<sup>29,30</sup>

32 30 Further research is needed to understand the availability and inequities in distribution  
33 31 of other health professionals relevant to ear and hearing care, including audiologists,  
34 32 and speech therapists, as well as mid-cadre and primary health professionals such  
35 33 as clinical officers that exist in many LMICs. Training primary health workers in ear



1 and hearing care has been a key strategy supported by the WHO in order to address  
2 the lack of human resources and improve access to services at the community level,  
3 in efforts to achieve universal ear and hearing care.<sup>27,31</sup> There is also a need to  
4 examine availability of equipment, and other essential elements of service provision.  
5 Although this study presents a clear picture of inequalities in distribution of  
6 specialists, the need for services is not well understood. There have been very few  
7 population-based surveys to determine the prevalence and causes of hearing loss in  
8 LA. In LA, there have been three published studies, two of which were in Brazil, and  
9 one in Ecuador.<sup>24</sup> Prevalence data are required to plan services according to the  
10 population need, including the required number and distribution of specialists.  
11 Although global Vision 2020 targets of ophthalmologists per population are  
12 contested, they have been used as an advocacy tool to lobby governments for  
13 increased resources for eye care. Thus, similar evidence-based targets should be  
14 developed for the field of ear and hearing. Vision 2020 has helped garner action to  
15 reduce avoidable causes of blindness, at a global and local scale. A similar global  
16 initiative for ear and hearing care has been launched in 2018, the World Hearing  
17 Forum, which aims to stimulate action and make gains similar to those attained in  
18 eye health.<sup>32</sup>

## 19 **Conclusion**

20 This study provides evidence that the availability and distribution of ENTs in LA  
21 countries is highly inequitable. A disproportionate number of ENTs are concentrated  
22 in more socially advantaged areas, such as capital cities. This evidence on health  
23 inequalities, with respect to access to ear and hearing services, can be used to  
24 support development of programmes and policies to increase the number and  
25 distribution of ear and hearing professionals. Actions to reduce these inequities are  
26 essential for efforts towards achieving UHC.

## 29 **Figure Legend**

30 **Figure 1:** Availability and distributive inequality of ENT for 15 Latin American countries benchmarked  
31 against regional mean values, 2017

32 *Source of population data: National Institute of Statistics*      *Source of ENT data: National Society of ENTs*

1  
2  
3 1 Source of HDI of each country: UNDP 2018<sup>20</sup>  
4  
5  
6  
7  
8  
9  
10  
11  
12  
13  
14  
15  
16  
17  
18  
19  
20  
21  
22  
23  
24  
25  
26  
27  
28  
29  
30  
31  
32  
33  
34  
35  
36  
37  
38  
39  
40  
41  
42  
43  
44  
45  
46  
47  
48  
49  
50  
51  
52  
53  
54  
55  
56  
57  
58  
59  
60

For peer review only

1  
2  
3 1 **Acknowledgements:** The authors would like to thank the Interamerican Association  
4 of Paediatric Otorhinolaryngology-IAPO for their assistance in obtaining data for this  
5 2  
6 3 study.

7  
8  
9 4 **Competing interests:** None to declare.

10  
11 5 **Funding source:** None

12  
13 6 **Data sharing statement:** Data are available upon request.

14  
15  
16 7 **Patient and public involvement:** It was not appropriate or possible to involve  
17 8 patients or the public in this work.

18  
19  
20 9 **Author contribution:** JCS conceived of the study, facilitated access to data,  
21 10 interpreted findings and helped draft the manuscript. TB and JR interpreted data and  
22 11 drafted the manuscript. OM and CM conceived of the study, were responsible for  
23 12 data analysis and edited the manuscript. CD, AM, EL, ES, DS, SC and AP facilitated  
24 13 access to data and critically reviewed the manuscript. All authors read and approved  
25 14 the final manuscript.

## 15 16 **References**

- 17 1. World Health Organization. Addressing the rising prevalence of hearing loss. Geneva: World  
18 Health Organization, 2018.
- 19 2. Bright T, Wallace S, Kuper H. A Systematic Review of Access to Rehabilitation for People  
20 with Disabilities in Low- and Middle-Income Countries. *International journal of environmental research  
21 and public health* 2018; **15**(10).
- 22 3. Mulwafu W, Ensink R, Kuper H, Fagan J. Survey of ENT services in sub-Saharan Africa: little  
23 progress between 2009 and 2015. *Global Health Action* 2017; **10**(1): 1289736.
- 24 4. World Health Organization. Multi-Country Assessment of National Capacity to Provide  
25 Hearing Care. 2013. [http://www.who.int/pbd/publications/WHOReportHearingCare\\_Englishweb.pdf](http://www.who.int/pbd/publications/WHOReportHearingCare_Englishweb.pdf)  
26 (accessed 16/05 2017).
- 27 5. The World Bank. The World Bank Open Data. 2018. <https://data.worldbank.org/> (accessed  
28 28/11 2018).
- 29 6. Atun R, de Andrade LOM, Almeida G, et al. Health-system reform and universal health  
30 coverage in Latin America. *The Lancet* 2015; **385**(9974): 1230-47.
- 31 7. World Bank. GDP per capita Latin America & Caribbean. 2018.  
32 <https://data.worldbank.org/indicator/NY.GDP.PCAP.CD?locations=ZJ-CL> (accessed 19/11 2018).
- 33 8. Frenk J, Gómez-Dantés O. Health Systems in Latin America: The Search for Universal Health  
34 Coverage. *Archives of Medical Research* 2018; **49**(2): 79-83.
- 35 9. Carpio C, Santiago Bench N. The Health Workforce in Latin America and the Caribbean: An  
36 Analysis of Colombia, Costa Rica, Jamaica, Panama, Peru, and Uruguay. . Washington DC: World  
37 Bank, 2015.
- 38 10. Stolovitzky JP, Alvarado J. Regional Overview of Specific Populations, Workforce  
39 Considerations, Training, and Diseases in Latin America. *Otolaryngol Clin North Am* 2018; **51**(3): 651-  
40 8.
- 41 11. Madriz JJ. Audiology in Latin America: hearing impairment, resources and services.  
42 *Scandinavian Audiology* 2009; **30**(2): 85-92.

- 1  
2  
3 1 12. Wagner R, Fagan J. Survey of otolaryngology services in Central America: need for a  
4 2 comprehensive intervention. *Otolaryngol Head Neck Surg* 2013; **149**(5): 674-8.  
5 3 13. United Nations DoEaSA, Population Division,. World Population Prospects: The 2017  
6 4 Revision, Key Findings and Advance Tables. Working Paper No. ESA/P/WP/248. New York: United  
7 5 Nations; 2017.  
8 6 14. United Nations Development Program. Human Development Report 2015 Technical Notes.  
9 7 New York: UNDP; 2015.  
10 8 15. Schneider MC, Castillo-Salgado C, Bacallao J, et al. Methods for measuring inequalities in  
11 9 health. *Rev Panam Salud Publica, Rev panam salud pública* 2002; **12**(6): 398-414.  
12 10 16. Hosseinpoor AR, Bergen N, Barros AJD, Wong KLM, Boerma T, Victora CG. Monitoring  
13 11 subnational regional inequalities in health: measurement approaches and challenges. *International*  
14 12 *Journal for Equity in Health* 2016; **15**(1): 18.  
15 13 17. World Health Organization. Handbook on health inequality monitoring with a special focus on  
16 14 low- and middle-income countries. Geneva: World Health Organization, 2013.  
17 15 18. Wagstaff A, Van Doorslaer E, Paci P. On the measurement of horizontal inequity in the  
18 16 delivery of health care. *Journal of Health Economics* 1991; **10**(2): 169-205.  
19 17 19. Minujin A, Delamonica E. Mind the gap! Widening child mortality disparities. *J Human Dev*  
20 18 2003; **4**(3): 397-418.  
21 19 20. United Nations Development Program. Human Development Indices and Indicators 2018  
22 20 Statistical Update. New York: UNDP; 2018.  
23 21 21. Westerberg BD, Lango MN. Otolaryngology-Related Disorders in Underserved Populations,  
24 22 Otolaryngology Training and Workforce Considerations in North America. *Otolaryngol Clin North Am*  
25 23 2018; **51**(3): 685-95.  
26 24 22. Hong H, Mujica OJ, Anaya J, Lansingh VC, Lopez E, Silva JC. The Challenge of Universal  
27 25 Eye Health in Latin America: distributive inequality of ophthalmologists in 14 countries. *BMJ Open*  
28 26 2016; **6**(11): e012819.  
29 27 23. Institute for Health Metrics and Evaluation. GBD Results Tool. 2017.  
30 28 <http://ghdx.healthdata.org/gbd-results-tool> (accessed 28/11 2018).  
31 29 24. Stevens G, Flaxman S, Brunskill E, Mascarenhas M, Mathers CD, Finucane M. Global and  
32 30 regional hearing impairment prevalence: an analysis of 42 studies in 29 countries. *European Journal*  
33 31 *of Public Health* 2011; **23**(1): 146-52.  
34 32 25. Wagstaff A, Paci P, van Doorslaer E. On the measurement of inequalities in health. *Social*  
35 33 *science & medicine (1982)* 1991; **33**(5): 545-57.  
36 34 26. World Health Organization. Handbook on health inequality monitoring with a special focus on  
37 35 low-and middle-income countries. Geneva: World Health Organization; 2013.  
38 36 27. World Health Organization. Universal health coverage and health financing. 2018.  
39 37 [http://www.who.int/health\\_financing/universal\\_coverage\\_definition/en/](http://www.who.int/health_financing/universal_coverage_definition/en/) (accessed 13/04 2018).  
40 38 28. Pan American Health Organisation. Strategy on Human Resources for Universal Access to  
41 39 Health and Universal Health Coverage. Washington DC: Pan American Health Organisation, 2017.  
42 40 29. Banks LM, Kuper H, Polack S. Poverty and disability in low- and middle-income countries: A  
43 41 systematic review. *PLOS ONE* 2017; **12**(12): e0189996.  
44 42 30. Marmot M. Just societies, health equity, and dignified lives: the PAHO Equity Commission.  
45 43 *The Lancet* 2018.  
46 44 31. World Health Organization. Primary Ear and Hearing Care Training Resource. 2006.  
47 45 [http://www.who.int/pbd/deafness/activities/hearing\\_care/basic.pdf?ua=1](http://www.who.int/pbd/deafness/activities/hearing_care/basic.pdf?ua=1) (accessed 25/05 2017).  
48 46 32. World Health Organization. World Hearing Forum. 2018. [http://www.who.int/deafness/world-](http://www.who.int/deafness/world-hearing-forum/en/)  
49 47 [hearing-forum/en/](http://www.who.int/deafness/world-hearing-forum/en/) (accessed 21/11 2018).  
50  
51  
52  
53  
54  
55  
56  
57  
58  
59  
60

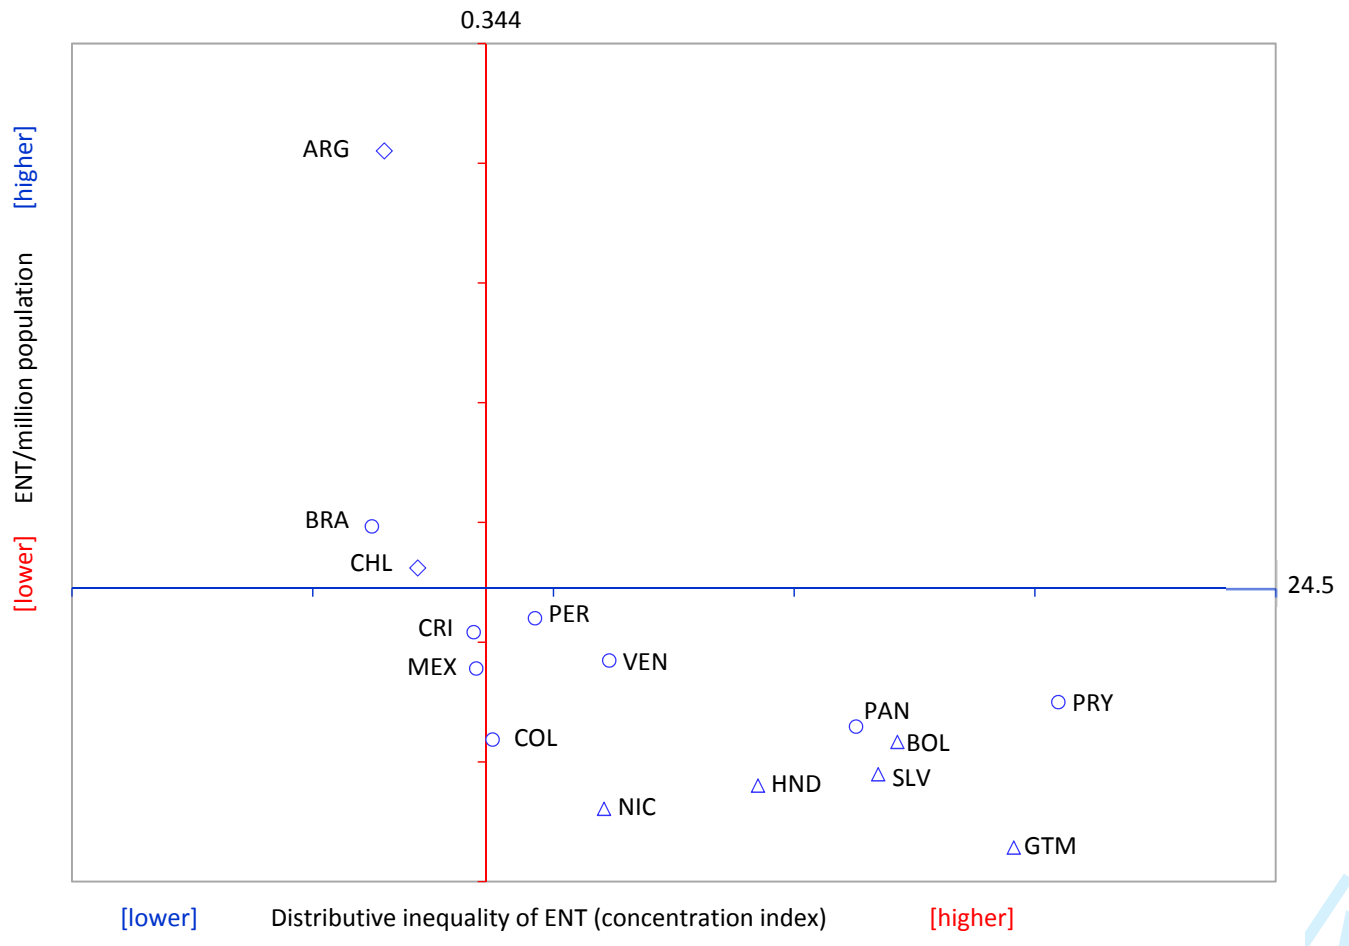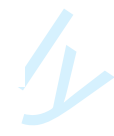

**Supplementary Figure 1:** Concentration curves of distributive inequality of ENTs for 15 Latin American countries, 2017

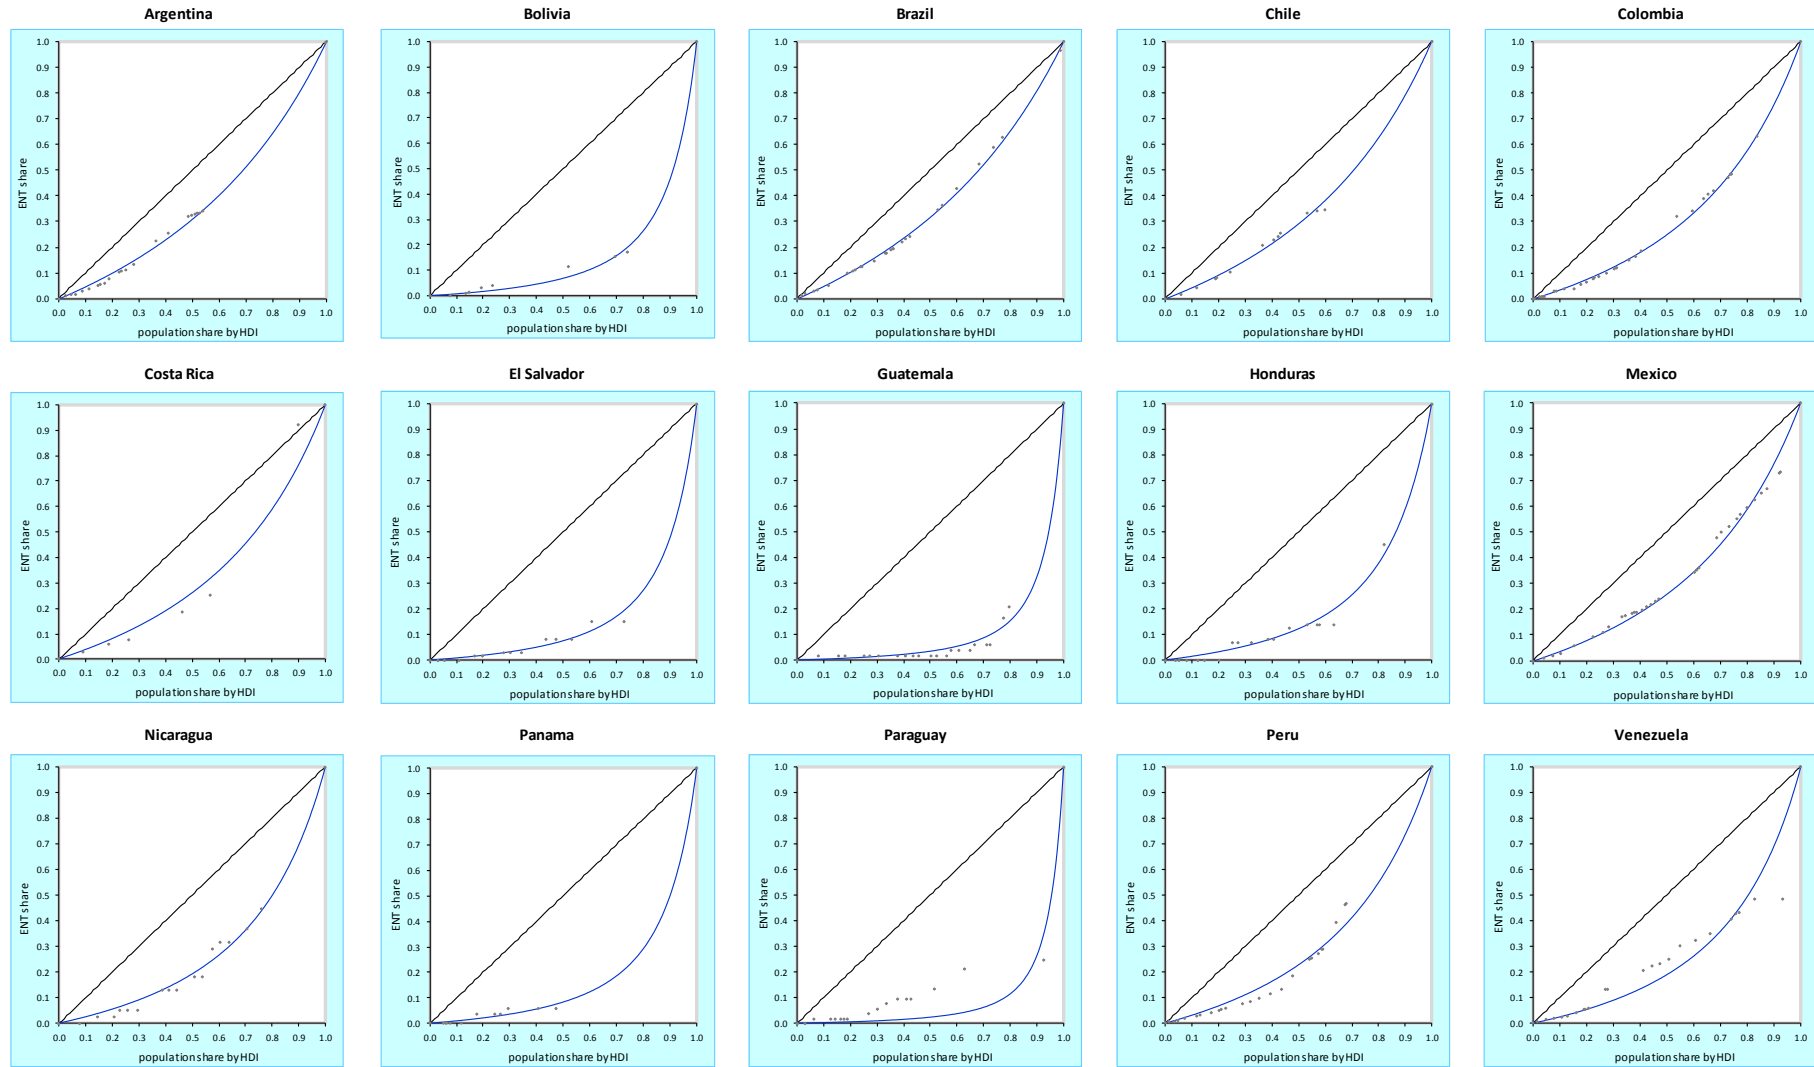

# BMJ Open

## Inequality in the distribution of Ear Nose and Throat specialists in 15 Latin American countries

|                                 |                                                                                                                                                                                                                                                                                                                                                                                                                                                                                                                                                                                                                                                                                                                                                                                                                                                                          |
|---------------------------------|--------------------------------------------------------------------------------------------------------------------------------------------------------------------------------------------------------------------------------------------------------------------------------------------------------------------------------------------------------------------------------------------------------------------------------------------------------------------------------------------------------------------------------------------------------------------------------------------------------------------------------------------------------------------------------------------------------------------------------------------------------------------------------------------------------------------------------------------------------------------------|
| Journal:                        | <i>BMJ Open</i>                                                                                                                                                                                                                                                                                                                                                                                                                                                                                                                                                                                                                                                                                                                                                                                                                                                          |
| Manuscript ID                   | bmjopen-2019-030220.R1                                                                                                                                                                                                                                                                                                                                                                                                                                                                                                                                                                                                                                                                                                                                                                                                                                                   |
| Article Type:                   | Research                                                                                                                                                                                                                                                                                                                                                                                                                                                                                                                                                                                                                                                                                                                                                                                                                                                                 |
| Date Submitted by the Author:   | 24-May-2019                                                                                                                                                                                                                                                                                                                                                                                                                                                                                                                                                                                                                                                                                                                                                                                                                                                              |
| Complete List of Authors:       | Bright, Tess; London School of Hygiene & Tropical Medicine, CRD<br>Mújica, Oscar; Pan American Health Organization, PAHO/WHO, Intelligence for Action in Health<br>Ramke, Jacqueline; LSHTM,<br>Moreno, Claudia; Pan American Health Organization<br>Der, Carolina ; Clínica Alemana de Santiago, Facultad de Medicina Universidad del Desarrollo<br>Melendez, Amarilis; Hospital Santo Tomas<br>Lara Ovaes, Ericka; University of Minnesota , School of Public Health<br>Sandoval Domingues, Edgar; Instituto de Seguridad y Servicios Sociales de los Trabajadores del Estado<br>Santana Hernandez, Diego Jose; CBM Christoffel-Blindenmission<br>Chadha, Shelly; The World Health Organization , WHO Programme for Prevention of Deafness and Hearing Loss<br>Silva, Juan Carlos; Pan American Health Organization<br>Penaranda, Augusto; Fundacion Santafe de Bogota |
| <b>Primary Subject Heading</b>: | Ear, nose and throat/otolaryngology                                                                                                                                                                                                                                                                                                                                                                                                                                                                                                                                                                                                                                                                                                                                                                                                                                      |
| Secondary Subject Heading:      | Health services research                                                                                                                                                                                                                                                                                                                                                                                                                                                                                                                                                                                                                                                                                                                                                                                                                                                 |
| Keywords:                       | Health policy < HEALTH SERVICES ADMINISTRATION & MANAGEMENT, Organisation of health services < HEALTH SERVICES ADMINISTRATION & MANAGEMENT, OTOLARYNGOLOGY, Health equity                                                                                                                                                                                                                                                                                                                                                                                                                                                                                                                                                                                                                                                                                                |
|                                 |                                                                                                                                                                                                                                                                                                                                                                                                                                                                                                                                                                                                                                                                                                                                                                                                                                                                          |

SCHOLARONE™  
Manuscripts

1  
2  
3 1 **Title: Inequality in the distribution of Ear Nose and Throat specialists in 15**  
4  
5 2 **Latin American countries**

6  
7 3 **Authors:** Tess Bright<sup>1</sup>, Oscar J Mujica<sup>2</sup>, Jacqueline Ramke<sup>1</sup>, Claudia M Moreno<sup>2</sup>,  
8  
9 4 Carolina Der<sup>3</sup>, Amarilis Melendez<sup>4</sup>, Ericka Lara Ovares<sup>5</sup>, Edgar Ivan Sandoval  
10  
11 5 Domingues<sup>6</sup>, Diego Jose Santana Hernandez<sup>7</sup> Shelly Chadha<sup>9</sup>, Juan C Silva<sup>2</sup> and  
12  
13 6 Augusto Peñaranda<sup>8</sup>

14  
15 7  
16  
17 8 **Affiliations**

- 19  
20 9 1) International Centre for Evidence in Disability, London School of Hygiene &  
21  
22 10 Tropical Medicine, Keppel St, London, WC1 E7HT  
23  
24 11 2) Pan American Health Organization, PAHO/WHO, Washington DC USA  
25  
26 12 3) Clínica Alemana de Santiago, Facultad de Medicina Universidad del  
27  
28 13 Desarrollo, Santiago, Chile.  
29  
30 14 4) Hospital Santo Tomas, Ciudad de Panamá, Panamá  
31  
32 15 5) University of Minnesota, School of Public Health, Minneapolis, Minnesota  
33  
34 16 55455, USA  
35  
36 17 6) Instituto de Seguridad y Servicios Sociales de los Trabajadores del Estado,  
37  
38 18 Morelos; México  
39  
40 19 7) CBM Christoffel-Blindenmission Christian Blind Mission e.V Stubenwald Alle  
41  
42 20 5, 64625, Bensheim, Germany  
43  
44 21 8) Interamerican Association of Paediatric Otorhinolaryngology, Bogota,  
45  
46 22 Colombia  
47  
48 23 9) Management of Noncommunicable Diseases, Disability, Violence and Injury  
49  
50 24 Prevention, World Health Organization, avenue Appia 20, 1211 Geneva 27,  
51  
52 25 Switzerland

53  
54  
55  
56  
57  
58  
59  
60  
27 **Corresponding author:** Jacqueline Ramke [Jacqueline.Ramke@lshtm.ac.uk](mailto:Jacqueline.Ramke@lshtm.ac.uk)



## 1 **Abstract**

2 **Objective:** To explore socio-geographic inequalities in the availability and  
3 distribution of Ear Nose and Throat specialists (ENTs) in 15 Latin American (LA)  
4 countries.

5 **Design:** Ecological

6 **Setting:** Spanish and Portuguese speaking countries of Latin America

7 The number of registered ENTs in 2017 were obtained from the National ENT  
8 Society in each country.

9 **Outcome measures:** The ENT rate/million population was calculated at the national  
10 and sub-national (e.g. state) level. Three measures were calculated to assess sub-  
11 national distributive inequality of ENTs: i) absolute and ii) relative index of  
12 dissimilarity; and iii) concentration index (using the Human Development Index as  
13 the equity stratifier). Finally, the ratio of ENTs/million population in the capital area  
14 compared to the rest of the country was calculated.

15 **Results:** There was a more than a 30-fold difference in the number of ENTs/million  
16 population across the included countries—from 61.0 in Argentina (95% Confidence  
17 Interval (CI) 58.7–63.4) to 2.8 in Guatemala (95%CI 2.1–3.8). In all countries ENTs  
18 were more prevalent in advantaged areas and in capital areas. To attain distributive  
19 equality, Paraguay would need to redistribute the greatest proportion of its ENT  
20 workforce (67.3%; 95%CI 57.8–75.6) and Brazil the least (18.5%; 95%CI 17.6–19.5).

21 **Conclusions:** There is high inequality in the number and distribution of ENTs  
22 between and within the 15 studied countries in Latin America. This evidence can be  
23 used to inform policies that improve access to ear and hearing services in the region,  
24 such as scale-up of training of ENTs and incentives to distribute specialists equally.  
25 These actions to reduce inequities, alongside addressing the social determinants of  
26 ear and hearing health, are essential to realise Universal Health Coverage.

27

### 1 **Strengths and limitations of this study**

- 2 • This is the first regional-level analysis on the availability and distribution of ENT  
3 specialists in Latin America, and includes 15 of the 19 Spanish or Portuguese-  
4 speaking countries.
- 5 • The three inequality measures used to assess subnational inequality—the  
6 relative concentration index, the absolute index of dissimilarity and the relative  
7 index of dissimilarity—take into account the entire population and are population-  
8 weighted, thus giving equal weight to each individual's access to ENTs.
- 9 • The data were obtained from national ENT societies, which may not be  
10 representative of all available ENTs, as some ENTs may not be society-affiliated.
- 11 • Data were not available on the distribution of ENTs in private vs public health  
12 services. Consequently, our results may overestimate the availability of ENTs for  
13 people without the resources to access the private sector.

## 1 Introduction

2 In 2018 there was an estimated 466 million people with disabling hearing loss, and  
3 over 80% of these reside in low and middle income countries (LMICs).<sup>1</sup> The World  
4 Health Organization (WHO) has estimated that by 2050 one in ten, or 900 million  
5 people, will experience disabling hearing loss unless substantial public health  
6 measures are implemented.<sup>1</sup> The predicted increase in prevalence can be attributed  
7 to the expected rise in global population, and global ageing.<sup>1</sup>

8 Consequently, there is a need for ear and hearing services, including surgical (e.g.  
9 Ear Nose and Throat specialists (ENTs)) and rehabilitative services (e.g.  
10 audiologists, and speech therapists), to meet the increasing demand. Indeed, in  
11 order to achieve Universal Health Coverage (UHC) for the millions of people with  
12 hearing loss globally, equitable access to effective, high quality and affordable ear  
13 and hearing services is vital. However, access to these services is extremely low in  
14 LMICs,<sup>2</sup> due to a dearth of human resources.<sup>3,4</sup>

15 Latin America (LA) has a combined population of 600 million people, approximately  
16 42 million (7%) of whom are estimated to have disabling hearing loss.<sup>1,5</sup> Countries  
17 within LA are highly diverse in terms of their historical, economic, political, and  
18 sociocultural contexts.<sup>6</sup> As an example, the GDP per capita in Chile is \$15,346, more  
19 than three times as much as Guatemala (\$4,470).<sup>6,7</sup> These vast economic  
20 differences have shaped health systems reforms in the region and efforts to achieve  
21 UHC.<sup>6,8</sup> As a consequence, countries in the region show variation in terms of human  
22 resource shortages for health care.<sup>9</sup> Previous research has found substantial  
23 shortages in the number of ENTs in 50% of LA countries.<sup>10</sup> Other professionals  
24 involved in ear and hearing care services, such as audiologists and speech  
25 therapists, are in even shorter supply.<sup>11</sup> There is also some evidence that within  
26 countries, ENTs are unequally distributed, with a higher concentration in urban  
27 compared to rural areas.<sup>12</sup> However, these inequities have not been examined in  
28 depth.

29 This study aimed to explore socio-geographic inequalities in the availability and  
30 distribution of ENTs both within and between 15 LA countries. The study  
31 hypothesised that regional variation in the availability of ENT specialists per million  
32 population exists. Within countries, ENT specialists were hypothesised to be

1  
2  
3 1 unequally distributed across sub-national regions, with the majority concentrated in  
4 2 areas of higher human development.

### 3 **Methods**

4 This is an ecological study that assesses the distributive inequality of ENT specialists  
5 in 15 countries in LA using standard measures of disproportionality across sub-  
6 national social gradients (defined by Human Development Indices). Ethical approval  
7 was not sought for this study, which used publicly available population data with  
8 organisational practitioner data.

### 9 **Data sources**

#### 10 *Population*

11 This paper focuses on the Spanish and Portuguese speaking countries of LA, of  
12 which there are 17. All LA countries were invited to participate, and 15 responded.  
13 The 15 included countries consist of 294 first-order sub-national units (e.g.  
14 department, province, state). Population data for these units were obtained from the  
15 national institutes of census and statistics of each country. The combined population  
16 of the included countries represent 96.7% of people in the LA Spanish and  
17 Portuguese speaking countries, and 88.2% of the total Latin America and the  
18 Caribbean regional population in 2017.<sup>13</sup>

#### 19 *Personnel*

20 Although ENT specialists alone do not capture the full complement of ear and  
21 hearing services necessary to treat and manage hearing loss, they were chosen as a  
22 key indicator to measure inequalities in access to ear and hearing services. An “ENT  
23 specialist” is defined for the purposes of this paper as a medical doctor who has  
24 been trained in the management of ear, nose and throat conditions, through a  
25 recognised degree.<sup>4</sup> Hereafter we refer to ENT specialists as ENTs.

26 In each country, data on the number ENTs registered at each of the sub-national  
27 units in 2017 were obtained from the National Society of ENTs. Societies were  
28 contacted by the Interamerican Association of Paediatric Otorhinolaryngology-IAPO  
29 or study authors, either by phone or email. Society membership requires a medical

1 degree, completion of residency at an accredited medical school, and a national  
2 practice license.

### 3 *Human Development Index*

4 The Human Development Index (HDI) was used as the equity stratifier of the sub-  
5 national units. The HDI is widely used by the United Nations Development  
6 Programme as a composite measure of achievement in three key dimensions of  
7 human development—health, education, and standard of living.<sup>14</sup> The HDI score is a  
8 value between zero and one which represents the geometric mean of the index of  
9 the three dimensions.<sup>14</sup> The most recent HDI for the sub-national units of each  
10 country were obtained from UNDP reports from each country. To create the social  
11 gradient, within each country, sub-national units were ordered from lowest HDI (most  
12 socially disadvantaged) to highest HDI (most socially advantaged).

## 13 **Analysis**

### 14 *Availability of ENT personnel*

15 The number of ENTs/million population was calculated for each sub-national unit of  
16 each country. The mean and 95% confidence interval (CI) of ENTs/million population  
17 at the national level were calculated.

### 18 *Inequality measures*

19 Inequality in the distribution of ENTs was assessed using three common indicators of  
20 health inequality<sup>15,16,17</sup>:

- 21 • Relative concentration index (RCI)

22 The RCI is a relative measure of gradient inequality that indicates the extent to  
23 which a health indicator is concentrated among the disadvantaged or the  
24 advantaged.<sup>17</sup> In this analysis the RCI measures the extent to which the ENT  
25 distribution across sub-national units is systematically associated with the social  
26 advantage of each sub-national unit (measured by HDI). RCI takes a value between  
27 -1 and 1, with 0 indicating no inequality (i.e., equal distribution). A negative value of  
28 RCI indicates ENTs are concentrated among more disadvantaged sub-national  
29 units, and a positive value indicates ENTs are concentrated among more advantaged  
30 sub-national units.

1  
2  
3 1 The RCI was calculated for each country using non-linear optimization to fit a  
4 Lorenz concentration curve and calculating the area under the curve.<sup>18</sup> The  
5 2 curve equation fit the observed cumulative proportion of the population (as  
6 3 ranked by the HDI of each sub-national unit) against the cumulative proportion of  
7 4 ENTs.  
8 5

9  
10  
11  
12 6 • Absolute index of dissimilarity (aID)

13  
14 7 The aID quantifies the number of ENTs within a given country who would need to  
15 8 be redistributed for the national rate of ENTs/million population to be achieved in  
16 9 each sub-national unit i.e. equitable distribution. The aID is half the sum of the  
17 10 absolute value of the differences between the national average ENTs and the  
18 11 number of ENTs observed in each unit.

19  
20  
21  
22  
23 12 • Relative index of dissimilarity (rID)

24  
25 13 The rID is the relative equivalent of the aID, representing the percentage of ENTs  
26 14 who would have to be redistributed to achieve equitable sub-national distribution.  
27 15 The rID is computed by dividing the aID by the total number of ENTs  
28 16 available.<sup>15,18</sup> The closer rID is to 100%, the greater the inequality.  
29  
30  
31  
32  
33

34 18 *Regional benchmarking*

35  
36 19 WHO recommends benchmarking within regions to understand one country's level of  
37 20 inequality in relation to others.<sup>17</sup> To benchmark ENT distribution in LA we calculated  
38 21 the regional weighted mean of ENTs/million population and the regional distributional  
39 22 inequality (measured by the RCI). We used these regional averages to construct a  
40 23 framework<sup>19</sup> with four quadrants and mapped each country based on whether its  
41 24 ENT rate and RCI were higher or lower than the regional average. The HDI level of  
42 25 each country<sup>20</sup> was also indicated.  
43  
44  
45  
46  
47  
48

49 26 *Urban concentration*

50  
51 27 To assess the extent of urban concentration of ENTs, the ENTs/million population in  
52 28 the capital area for each country (i.e. the sub-national unit that contains the  
53 29 constitutional capital or the seat of government city), as compared to the rate in the  
54 30 rest of the country combined (i.e. all sub-national units apart from the capital area).  
55 31 The ratio of ENTs/million population in the capital compared to the rest of the country  
56 32 was calculated.  
57  
58  
59  
60

1  
2  
3  
4 1  
5 2 All statistical analyses were performed in MS Excel Solver and ToolPak add-ins  
6 3 (Microsoft Corp., Redmond, Washington, USA), using a semiautomated analytical  
7 4 template tool developed by the Pan American Health Organization (PAHO) for  
8 5 exploratory data analysis of social inequalities in health. Uncertainty was ascertained  
9 6 by computing 95% CIs for all summary measures of health inequality as well as the  
10 7 mean number of ENTs/million population.  
11  
12  
13  
14  
15  
16 8

## 17 18 9 **Results**

### 19 20 21 10 *Between country inequality*

22  
23 11 In these 15 LA countries, there was large variation in the size of the ENT profession,  
24 12 the rate of ENTs/million population and the distributive inequality (Table 1). For  
25 13 example, Brazil had 6,159 registered ENTs while Nicaragua had only 38. When the  
26 14 population size was taken into account, there was a more than a 30-fold difference in  
27 15 the number of ENTs/million population—from 61.0 in Argentina (95%CI 58.7–63.4) to  
28 16 2.8 in Guatemala (95%CI 2.1–3.8) (Table 1). There was also large variation in  
29 17 distributive inequality. In all countries ENTs were more prevalent in advantaged  
30 18 areas but the extent of this inequality varied greatly—inequality was lowest in Brazil  
31 19 (RCI 0.249; 95%CI 0.133–0.365) and highest in Paraguay (RCI 0.819; 95%CI  
32 20 0.769–0.870) (supplementary figure 1).  
33  
34  
35  
36  
37  
38  
39  
40

### 41 21 Regional benchmarking

42  
43 22 The regional variation in the ENT rate and distributive inequality is depicted in Figure  
44 23 1. The high ENT rate in Argentina—more than twice as high as the rate in the next  
45 24 highest country—inflated the regional weighted mean of 24.5/million (95%CI 23.3–  
46 25 25.7) (Figure 1). Brazil and Chile were the only other countries to have an ENT rate  
47 26 higher than the regional average. These three countries also had lower distributive  
48 27 inequality than the regional average (RCI 0.344; 95%CI 0.227–0.460), placing them  
49 28 in the best performing, top left quadrant of Figure 1. In contrast, the countries in the  
50 29 bottom right quadrant had a lower ENT rate and higher inequality compared to the  
51 30 regional average, with Guatemala arguably furthest behind other countries in the  
52 31 region.  
53  
54  
55  
56  
57  
58  
59  
60

1  
2  
3 1 The ENT rate tended to reflect the national HDI level. Countries with very high HDI  
4 had the highest ENT rate, followed by countries with high HDI, and then countries  
5 with medium HDI tending to have the lowest ENT rate. Distributive inequality was  
6 similar with two exceptions—Paraguay and Panama are high HDI countries but had  
7 distributive inequality more equivalent to countries of medium HDI (Figure 1).  
8  
9  
10  
11  
12

### 13 *Within country inequality*

14  
15 7 The redistributive potential to achieve equality mirrored the RCI results, with Brazil  
16 needing to redistribute the lowest proportion of their ENTs to achieve distributive  
17 equality (rID 18.5%; 95%CI 17.6–19.5) and Paraguay the highest (rID 67.3%; 95%CI  
18 57.8–75.6) (Table 1). Due to the size of the respective workforce, this equates to  
19 redistributing 1,142 ENTs in Brazil and 70 in Paraguay (aID; Table 1).  
20  
21  
22  
23

### 24 Urban concentration

25  
26  
27 13 In all countries, even when the population size was taken into account, ENTs were more  
28 concentrated in capital areas (Table 2). Argentina fared best, but the ENT rate in the  
29 capital area remained over twice as high as the rest of the country (C:R ratio 2.3; 95%  
30 CI 2.1–2.5).  
31  
32  
33

34 17 The largest inequality between capital and other areas was seen in Paraguay (C:R ratio  
35 36.7; 95%CI 23.6–57.2), Venezuela (C:R ratio 15.2; 95%CI 12.9–17.9) and Panama  
36 (C:R ratio 15.1; 95%CI 4.7–48.5). The high C:R inequality observed in Paraguay and  
37 Venezuela was driven by high ENT rates in the capital. In turn, these rates were driven  
38 by the low proportion of the national population residing in the capital area (7.6% and  
39 6.6% respectively), combined with the majority of ENTs being located there (75.0% and  
40 51.9% respectively). In contrast, the high C:R inequality in Panama was driven by the  
41 very low ENT rates in the rest of the country, with only three of the country's 53 ENTs  
42 (5.7%) stationed outside the capital (Table 2).  
43  
44  
45  
46  
47  
48  
49  
50  
51  
52  
53  
54  
55  
56  
57  
58  
59  
60

26



1 **Table 1:** Distributive inequality of ENTs per million population in 15 Latin American countries, 2017

| Country       | Population <sup>a</sup> | Number of ENTs <sup>b</sup> | Number of sub-national units (e.g. states) <sup>a</sup> | ENTs per million population |           | Relative Concentration Index (RCI) <sup>c</sup> |              | Absolute index of dissimilarity |             | Relative index of dissimilarity |           |
|---------------|-------------------------|-----------------------------|---------------------------------------------------------|-----------------------------|-----------|-------------------------------------------------|--------------|---------------------------------|-------------|---------------------------------|-----------|
|               |                         |                             |                                                         | Mean                        | 95%CI     | Mean                                            | 95%CI        | Mean                            | 95%CI       | Mean (%)                        | 95%CI     |
| Argentina     | 44,044,811              | 2,688                       | 23                                                      | 61.0                        | 58.7-63.4 | 0.259                                           | 0.128-0.391  | 575                             | 534-618     | 21.4                            | 19.9-23.0 |
| Bolivia       | 11,145,770              | 130                         | 9                                                       | 11.7                        | 9.7-13.8  | 0.686                                           | 0.507-0.864  | 75                              | 64-86       | 57.7                            | 49.1-65.8 |
| Brazil        | 207,660,929             | 6,159                       | 27                                                      | 29.7                        | 28.9-30.4 | 0.249                                           | 0.133-0.365  | 1,142                           | 1,083-1,203 | 18.5                            | 17.6-19.5 |
| Chile         | 17,598,287              | 461                         | 13                                                      | 26.2                        | 23.9-28.7 | 0.287                                           | 0.058-0.517  | 115                             | 98-134      | 24.9                            | 21.2-29.1 |
| Colombia      | 49,291,609              | 584                         | 33                                                      | 11.8                        | 10.9-12.8 | 0.349                                           | 0.262-0.437  | 155                             | 135-177     | 26.5                            | 23.1-30.3 |
| Costa Rica    | 4,947,481               | 103                         | 7                                                       | 20.8                        | 17.0-25.2 | 0.334                                           | -0.065-0.732 | 35                              | 26-45       | 34.0                            | 25.6-43.6 |
| El Salvador   | 6,581,940               | 59                          | 14                                                      | 9.0                         | 6.8-11.6  | 0.670                                           | 0.546-0.794  | 34                              | 27-41       | 57.6                            | 44.9-69.4 |
| Guatemala     | 16,924,191              | 48                          | 22                                                      | 2.8                         | 2.1-3.8   | 0.782                                           | 0.749-0.816  | 32                              | 25-38       | 66.7                            | 52.5-78.3 |
| Honduras      | 8,866,351               | 71                          | 18                                                      | 8.0                         | 6.3-10.1  | 0.570                                           | 0.441-0.699  | 36                              | 28-44       | 50.7                            | 39.3-62.0 |
| Mexico        | 124,041,731             | 2,207                       | 32                                                      | 17.8                        | 17.1-18.6 | 0.336                                           | 0.238-0.433  | 631                             | 590-673     | 28.6                            | 26.7-30.5 |
| Nicaragua     | 6,262,703               | 38                          | 17                                                      | 6.1                         | 4.3-8.3   | 0.442                                           | 0.291-0.593  | 16                              | 11-22       | 42.1                            | 27.9-57.8 |
| Panama        | 4,098,135               | 53                          | 12                                                      | 12.9                        | 9.7-16.9  | 0.651                                           | 0.564-0.738  | 22                              | 16-29       | 41.5                            | 29.3-54.9 |
| Paraguay      | 6,941,905               | 104                         | 18                                                      | 15.0                        | 12.2-18.2 | 0.819                                           | 0.769-0.870  | 70                              | 60-79       | 67.3                            | 57.8-75.6 |
| Peru          | 29,381,884              | 646                         | 25                                                      | 22.0                        | 20.3-23.7 | 0.385                                           | 0.276-0.494  | 213                             | 190-237     | 33.0                            | 29.5-36.7 |
| Venezuela     | 31,428,916              | 580                         | 24                                                      | 18.5                        | 17.0-20.0 | 0.446                                           | 0.307-0.586  | 275                             | 252-299     | 47.4                            | 43.4-51.5 |
| All countries | 569,216,643             | 13,931                      | 294                                                     | 24.5                        | 23.3-25.7 | 0.344                                           | 0.227-0.460  | 3,426                           | 3,139-3,725 | 28.5                            | 25.5-31.5 |

2 *ENT: Ear nose and throat specialist*3 *a Source: National Institute of Statistics      b Source: National Society of ENTs*4 *c The Relative Concentration Index departs from equity for all countries, except Costa Rica (i.e. the confidence intervals do not overlap with zero)*

1 **Table 2:** Number of ENTs per million population in the capital area compared to the rest of the country in 15 Latin American countries, 2017

| Country     | ENTs per million population |             |                 |           | Ratio of ENT rate<br>Capital: Rest-of-country<br>(C:R ratio) |           | Proportion of<br>population in<br>Capital area<br>(%) <sup>a</sup> | Proportion of<br>ENTs in Capital<br>area<br>(%) <sup>b</sup> | Capital area description     |
|-------------|-----------------------------|-------------|-----------------|-----------|--------------------------------------------------------------|-----------|--------------------------------------------------------------------|--------------------------------------------------------------|------------------------------|
|             | Capital area                |             | Rest-of-country |           | Mean                                                         | 95%CI     |                                                                    |                                                              |                              |
|             | Mean                        | 95%CI       | Mean            | 95%CI     |                                                              |           |                                                                    |                                                              |                              |
| Argentina   | 88.1                        | 84.0-92.3   | 38.4            | 35.9-40.9 | 2.3                                                          | 2.1-2.5   | 45.6%                                                              | 65.8%                                                        | Buenos Aires Autonomous City |
| Bolivia     | 37.7                        | 31.0-45.6   | 2.7             | 1.7-4.0   | 14.2                                                         | 9.0-22.5  | 25.7%                                                              | 83.1%                                                        | La Paz Department            |
| Brazil      | 67.8                        | 58.8-77.7   | 29.1            | 28.4-29.8 | 2.3                                                          | 2.0-2.7   | 1.5%                                                               | 3.3%                                                         | Federal District             |
| Chile       | 42.3                        | 37.7-47.4   | 15.3            | 13.0-17.8 | 2.8                                                          | 2.3-3.4   | 40.4%                                                              | 65.3%                                                        | Metropolitan Region          |
| Colombia    | 26.7                        | 23.3-30.5   | 8.9             | 8.0-9.9   | 3.0                                                          | 2.5-3.5   | 16.4%                                                              | 37.0%                                                        | Bogota Capital District      |
| Costa Rica  | 42.6                        | 33.1-53.9   | 10.2            | 7.1-14.3  | 4.2                                                          | 2.8-6.3   | 32.8%                                                              | 67.0%                                                        | San Jose Province            |
| El Salvador | 28.0                        | 20.8-36.9   | 1.9             | 0.9-3.6   | 14.9                                                         | 7.3-30.3  | 27.1%                                                              | 84.7%                                                        | San Salvador Department      |
| Guatemala   | 11.0                        | 7.8-15.1    | 0.7             | 0.4-1.4   | 14.9                                                         | 7.4-29.8  | 20.4%                                                              | 79.2%                                                        | Guatemala Department         |
| Honduras    | 24.4                        | 17.3-33.3   | 4.4             | 3.0-6.2   | 5.5                                                          | 3.5-8.8   | 18.1%                                                              | 54.9%                                                        | Francisco Morazan Department |
| Mexico      | 65.4                        | 60.3-70.9   | 14.0            | 13.4-14.7 | 4.7                                                          | 4.2-5.1   | 7.3%                                                               | 26.8%                                                        | Federal District             |
| Nicaragua   | 14.1                        | 8.8-21.6    | 3.6             | 2.1-5.7   | 4.0                                                          | 2.1-7.5   | 23.7%                                                              | 55.3%                                                        | Managua Department           |
| Panama      | 23.3                        | 17.3-30.7   | 1.5             | 0.3-4.5   | 15.1                                                         | 4.7-48.5  | 52.4%                                                              | 94.3%                                                        | Panama Province              |
| Paraguay    | 148.8                       | 117.6-185.7 | 4.1             | 2.6-5.9   | 36.7                                                         | 23.6-57.2 | 7.6%                                                               | 75.0%                                                        | Asuncion Capital City        |
| Peru        | 36.5                        | 32.7-40.5   | 15.1            | 13.4-16.9 | 2.4                                                          | 2.1-2.8   | 32.3%                                                              | 53.6%                                                        | Lima Department              |
| Venezuela   | 144.3                       | 128.5-161.6 | 9.5             | 8.4-10.7  | 15.2                                                         | 12.9-17.9 | 6.6%                                                               | 51.9%                                                        | Capital District             |

2 *ENT: Ear nose and throat specialist*3 *a Source: National Institute of Statistics*3 *b Source: National Society of ENTs*

## 1 Discussion

2 This study examined the socio-geographic distribution of ENTs between and within  
3 15 LA countries. We found that the availability of ENTs across countries of the region  
4 is highly variable. Within countries, the distribution was shown to be unequal, with  
5 more socially advantaged areas, and capital areas, having a higher concentration of  
6 ENT specialists. Despite inequality in countries such as Argentina, Brazil and Chile  
7 being up to three times lower than Paraguay and Guatemala, the RCI in all 15  
8 countries was at a level WHO considers a high level of relative inequality.<sup>17</sup> This high  
9 inequality was reinforced by the rID, which indicates between one in five ENTs in  
10 Brazil and two in three ENTs in Paraguay would need to be redistributed to attain  
11 socio-geographic equality.

12 The findings of this study concur with previous literature from both the LA region and  
13 elsewhere. Wagner et al. (2013) and Stolovitsy et al. (2018) also found that  
14 Guatemala had the poorest ratio of ENTs/100,000 population (4 per million), which  
15 was only 11% of the ratio in the United States.<sup>10,12</sup> Both studies also found the  
16 highest ratio was in Argentina (56 per million). These trends align with our findings,  
17 however we found a lower ratio in Guatemala and higher ratio in Argentina which  
18 may be explained by population increases, or increases in the numbers of ENTs  
19 respectively.<sup>10,12</sup> In 2001, Madriz and colleagues surveyed 15 Latin American and  
20 the Caribbean countries to determine the resources available for hearing impairment,  
21 including prevalence data, training programmes, and equipment. They found Brazil  
22 (5000 ENTs), Argentina (3000 ENTs), and Mexico (2400 ENTs) had the greatest  
23 absolute numbers of human resources. Although the survey was published over 15  
24 years ago, it appears that there has been little progress in human resource  
25 development since this study was conducted.<sup>11</sup> In fact, the number of ENTs in our  
26 study was lower in comparison for Argentina, Guatemala, and Mexico. This may be  
27 due to differences in data sources, with the 2001 survey using expert opinion across  
28 a range of institutions rather than National societal membership.<sup>11</sup> In 2012, the WHO  
29 conducted a global survey of availability of human resources to provide ear and  
30 hearing care. They demonstrated great variation in availability of ENTs, audiologists,  
31 and speech therapists globally, and a clear trend of increased availability with  
32 country-income group.<sup>4</sup>

1  
2  
3 1 Despite the trend in increased availability with national income, inequalities in access  
4 2 to services still exist within countries. Within country disparities in availability of ENTs  
5 3 have been less well documented. Westerburg et al. (2018) reports that the  
6 4 geographic distribution of ENTs in North America is inequitable, contributing to poor  
7 5 access for vulnerable populations.<sup>21</sup> In Canada, for example, the majority of  
8 6 providers are located in urban centres, and there are no providers at all in many  
9 7 areas where Aboriginal populations are concentrated.<sup>21</sup> The trends we found in this  
10 8 study have also been observed in eye health in the region. Hong et al. (2016) found  
11 9 that ophthalmologists are more concentrated in socially advantaged areas within  
12 10 countries.<sup>22</sup> However, comparisons to this study highlight that the low coverage of  
13 11 ENTs appears to be more pronounced than in eye health. For example in  
14 12 Venezuela, there are 42 ophthalmologists/million, whereas our analysis found a ratio  
15 13 of 18.5 ENTs/million. Thus, for every ENT in Venezuela there are two  
16 14 ophthalmologists. This is despite comparable burden of impairments (16%  
17 15 hearing; 18% vision).<sup>23</sup> The reasons for this difference could allow lessons to be  
18 16 drawn on improving ear and hearing services availability in the country. Compared to  
19 17 ophthalmologists, ENTs in LA also tend to be less equally distributed. There are  
20 18 several possible explanations for this, including the lack of population-based data on  
21 19 need for services, and lack of funding, leading to ear and hearing care not being  
22 20 prioritised by the regional governments.<sup>24</sup> The reasons for the concentration of ENTs  
23 21 in more socially advantaged areas likely include better availability of equipment,  
24 22 facilities, and specialist training centres.

25  
26  
27  
28  
29  
30  
31  
32  
33  
34  
35  
36  
37  
38  
39  
40  
41  
42 23 This study has several strengths. Although previous literature has examined  
43 24 numbers of ENTs per population and made comparisons across countries, there has  
44 25 been limited analysis of inequalities within countries. This study adds to the  
45 26 knowledge base by performing a robust, more in-depth analysis of the substantial  
46 27 sub-national inequalities that exist. The three inequality measures used in this  
47 28 analysis take into account the entire population and are population-weighted, thus  
48 29 giving equal weight to each individual's access to ENTs.<sup>16,25</sup> These strengths—along  
49 30 with reflecting the socioeconomic dimension to health inequality—are why WHO  
50 31 recommends the concentration index as a measure of relative inequality.<sup>26</sup> The data  
51 32 coverage of this study was high, representing 96.7% of the LA Spanish and  
52 33 Portuguese speaking countries.

1  
2  
3 1 There are also limitations which should be taken into account when interpreting the  
4 results. The data were obtained from national ENT societies, which may not be  
5 2 representative of all available ENTs within the countries studied as some ENTs may  
6 3 not be society-affiliated. Although ENT specialists are an essential component of  
7 4 functioning ear and hearing care programmes, there are also many other  
8 5 professionals involved in provision of specialist care for hearing loss and ear  
9 6 disease, for instance, audiologists and speech therapists. Further, data on the  
10 7 availability of equipment to enable service provision is not provided. In addition, we  
11 8 have assumed that ENTs in LMICs deliver the full range of ear and hearing services.  
12 9 However, it is possible that some ENT specialists are subspecialised and provide  
13 10 services for only one of ears, nose or throat. The data also do not capture more  
14 11 nuanced service delivery models common in LMICs, such as surgical outreach to  
15 12 primary and secondary care facilities or telemedicine. This is an area of future  
16 13 research need. Finally, data were not available on the distribution of ENTs in private  
17 14 vs public health services which has an impact on the financial accessibility of the  
18 15 service. Thus, we are unable to draw conclusions on the availability full complement  
19 16 of ear and hearing services.  
20 17

21 18 While not a limitation of our study, we acknowledge that distribution of personnel is  
22 19 only one aspect of access to hearing care, Productivity of these personnel, as well  
23 20 as the quality and costs of hearing services are also important components that  
24 21 require attention to realise universal hearing care.<sup>27</sup>

25 22 This study provides evidence for policy makers to further develop programmes that  
26 23 increase the number of ENTs/million population as well as reduce the inequities in  
27 24 their distribution. The Pan American Health Organisation (PAHO), the regional WHO  
28 25 office for the Americas, has developed a strategy to guide national policies on  
29 26 addressing human resource deficiencies.<sup>28</sup> Some of the key strategies outlined  
30 27 include strengthening governance and leadership, focussing on the number and  
31 28 distribution of personnel according to health needs; partnership with other relevant  
32 29 sectors, such as education, in order to respond to training needs across geographic  
33 30 regions; and implementing staff retention strategies, such as incentives and  
34 31 improved infrastructure.<sup>28</sup> We acknowledge there is no definitive 'right' number of  
35 32 ENTs/ million population, and instead countries must consider all of these elements.  
36 33 Access to health is required to achieve good health outcomes, however in

1  
2  
3 1 addressing health inequities, actions must also be taken to address the social  
4 2 determinants of health. As an example, hearing loss and ear disease are linked to  
5 3 poverty, and thus to address the greater burden amongst the poor, a multi-faceted  
6 4 approach is required – beyond a focus on human resource development alone.<sup>29,30</sup>

7  
8  
9  
10 5 Further research is needed to understand the availability and inequities in distribution  
11 6 of other health professionals relevant to ear and hearing care, including audiologists,  
12 7 and speech therapists, as well as mid-cadre and primary health professionals such  
13 8 as clinical officers that exist in many LMICs. Training primary health workers in ear  
14 9 and hearing care has been a key strategy supported by the WHO in order to address  
15 10 the lack of human resources and improve access to services at the community level,  
16 11 in efforts to achieve universal ear and hearing care.<sup>27,31</sup> There is also a need to  
17 12 examine availability of equipment, and other essential elements of service provision.  
18 13 Although this study presents a clear picture of inequalities in distribution of  
19 14 specialists, the need for services is not well understood. There have been very few  
20 15 population-based surveys to determine the prevalence and causes of hearing loss in  
21 16 LA. In LA, there have been three published studies, two of which were in Brazil, and  
22 17 one in Ecuador.<sup>24</sup> Prevalence data are required to plan services according to the  
23 18 population need, including the required number and distribution of specialists.  
24 19 Although global Vision 2020 targets of ophthalmologists per population are  
25 20 contested, they have been used as an advocacy tool to lobby governments for  
26 21 increased resources for eye care. Thus, similar evidence-based targets should be  
27 22 developed for the field of ear and hearing. Vision 2020 has helped garner action to  
28 23 reduce avoidable causes of blindness, at a global and local scale. A similar global  
29 24 initiative for ear and hearing care has been launched in 2018, the World Hearing  
30 25 Forum, which aims to stimulate action and make gains similar to those attained in  
31 26 eye health.<sup>32</sup>

## 27 **Conclusion**

28 This study provides evidence that the availability and distribution of ENTs in LA  
29 30 countries is highly inequitable. A disproportionate number of ENTs are concentrated  
31 32 in more socially advantaged areas, such as capital cities. This evidence on health  
inequalities, with respect to access to ear and hearing services, can be used to  
support development of programmes and policies to increase the number and

1  
2  
3 1 distribution of ear and hearing professionals. Actions to reduce these inequities are  
4  
5 2 essential for efforts towards achieving UHC.  
6  
7 3  
8  
9 4  
10

## 11 **Figure Legend**

12 **Figure 1:** Availability and distributive inequality of ENT for 15 Latin American countries benchmarked  
13  
14 7 against regional mean values, 2017  
15

16 8 *Source of population data: National Institute of Statistics*      *Source of ENT data: National Society of ENTs*

17  
18 9 *Source of HDI of each country: UNDP 2018<sup>20</sup>*  
19  
20  
21  
22  
23  
24  
25  
26  
27  
28  
29  
30  
31  
32  
33  
34  
35  
36  
37  
38  
39  
40  
41  
42  
43  
44  
45  
46  
47  
48  
49  
50  
51  
52  
53  
54  
55  
56  
57  
58  
59  
60

12 **Acknowledgements:** The authors would like to thank the Interamerican Association  
13  
14 of Paediatric Otorhinolaryngology-IAPO for their assistance in obtaining data for this  
15  
16 study. JR is a Commonwealth Rutherford Fellow, funded by the UK government  
17  
18 through the Commonwealth Scholarship Commission in the UK.

19 **Competing interests:** None to declare.

20 **Funding source:** Pan American Health Organization.

21 **Data sharing statement:** The data used in this study include (for the 15 countries):  
22  
23 i) the number of members of national ENT societies at the national and subnational  
24  
25 level; ii) the population distribution at the subnational level; and iii) the calculated  
26  
27 inequality indices. These data are available on reasonable request from Dr Juan  
28  
29 Carlos Silva ORCID ID: 0000-0003-4855-5008.

30 **Patient and public involvement:** It was not appropriate or possible to involve  
31  
32 patients or the public in this work.

33 **Author contribution:** JCS conceived of the study, facilitated access to data,  
34  
35 interpreted findings and helped draft the manuscript. TB and JR interpreted data and  
36  
37 drafted the manuscript. OM and CM conceived of the study, were responsible for  
38  
39 data analysis and edited the manuscript. CD, AM, EL, ES, DS, SC and AP facilitated  
40  
41 access to data and critically reviewed the manuscript. All authors read and approved  
42  
43 the final manuscript.

## References

1. World Health Organization. Addressing the rising prevalence of hearing loss. Geneva: World Health Organization, 2018.
2. Bright T, Wallace S, Kuper H. A Systematic Review of Access to Rehabilitation for People with Disabilities in Low- and Middle-Income Countries. *International journal of environmental research and public health* 2018; **15**(10).
3. Mulwafu W, Ensink R, Kuper H, Fagan J. Survey of ENT services in sub-Saharan Africa: little progress between 2009 and 2015. *Global Health Action* 2017; **10**(1): 1289736.
4. World Health Organization. Multi-Country Assessment of National Capacity to Provide Hearing Care. 2013. [http://www.who.int/pbd/publications/WHOReportHearingCare\\_Englishweb.pdf](http://www.who.int/pbd/publications/WHOReportHearingCare_Englishweb.pdf) (accessed 16/05 2017).
5. The World Bank. The World Bank Open Data. 2018. <https://data.worldbank.org/> (accessed 28/11 2018).
6. Atun R, de Andrade LOM, Almeida G, et al. Health-system reform and universal health coverage in Latin America. *The Lancet* 2015; **385**(9974): 1230-47.
7. World Bank. GDP per capita Latin America & Caribbean. 2018. <https://data.worldbank.org/indicator/NY.GDP.PCAP.CD?locations=ZJ-CL> (accessed 19/11 2018).
8. Frenk J, Gómez-Dantés O. Health Systems in Latin America: The Search for Universal Health Coverage. *Archives of Medical Research* 2018; **49**(2): 79-83.
9. Carpio C, Santiago Bench N. The Health Workforce in Latin America and the Caribbean: An Analysis of Colombia, Costa Rica, Jamaica, Panama, Peru, and Uruguay. . Washington DC: World Bank, 2015.
10. Stolovitzky JP, Alvarado J. Regional Overview of Specific Populations, Workforce Considerations, Training, and Diseases in Latin America. *Otolaryngol Clin North Am* 2018; **51**(3): 651-8.
11. Madriz JJ. Audiology in Latin America: hearing impairment, resources and services. *Scandinavian Audiology* 2009; **30**(2): 85-92.
12. Wagner R, Fagan J. Survey of otolaryngology services in Central America: need for a comprehensive intervention. *Otolaryngol Head Neck Surg* 2013; **149**(5): 674-8.
13. United Nations DoEaSA, Population Division,. World Population Prospects: The 2017 Revision, Key Findings and Advance Tables. Working Paper No. ESA/P/WP/248. New York: United Nations; 2017.
14. United Nations Development Program. Human Development Report 2015 Technical Notes. New York: UNDP; 2015.
15. Schneider MC, Castillo-Salgado C, Bacallao J, et al. Methods for measuring inequalities in health. *Rev Panam Salud Publica, Rev panam salud pública* 2002; **12**(6): 398-414.
16. Hosseinpoor AR, Bergen N, Barros AJD, Wong KLM, Boerma T, Victora CG. Monitoring subnational regional inequalities in health: measurement approaches and challenges. *International Journal for Equity in Health* 2016; **15**(1): 18.
17. World Health Organization. Handbook on health inequality monitoring with a special focus on low- and middle-income countries. Geneva: World Health Organization, 2013.
18. Wagstaff A, Van Doorslaer E, Paci P. On the measurement of horizontal inequity in the delivery of health care. *Journal of Health Economics* 1991; **10**(2): 169-205.
19. Minujin A, Delamonica E. Mind the gap! Widening child mortality disparities. *J Human Dev* 2003; **4**(3): 397-418.
20. United Nations Development Program. Human Development Indices and Indicators 2018 Statistical Update. New York: UNDP; 2018.
21. Westerberg BD, Lango MN. Otolaryngology-Related Disorders in Underserved Populations, Otolaryngology Training and Workforce Considerations in North America. *Otolaryngol Clin North Am* 2018; **51**(3): 685-95.
22. Hong H, Mujica OJ, Anaya J, Lansingh VC, Lopez E, Silva JC. The Challenge of Universal Eye Health in Latin America: distributive inequality of ophthalmologists in 14 countries. *BMJ Open* 2016; **6**(11): e012819.
23. Institute for Health Metrics and Evaluation. GBD Results Tool. 2017. <http://ghdx.healthdata.org/gbd-results-tool> (accessed 28/11 2018).
24. Stevens G, Flaxman S, Brunskill E, Mascarenhas M, Mathers CD, Finucane M. Global and regional hearing impairment prevalence: an analysis of 42 studies in 29 countries. *European Journal of Public Health* 2011; **23**(1): 146-52.



- 1  
2  
3 1 25. Wagstaff A, Paci P, van Doorslaer E. On the measurement of inequalities in health. *Social*  
4 2 *science & medicine (1982)* 1991; **33**(5): 545-57.  
5 3 26. World Health Organization. Handbook on health inequality monitoring with a special focus on  
6 4 low-and middle-income countries. Geneva: World Health Organization; 2013.  
7 5 27. World Health Organization. Universal health coverage and health financing. 2018.  
8 6 [http://www.who.int/health\\_financing/universal\\_coverage\\_definition/en/](http://www.who.int/health_financing/universal_coverage_definition/en/) (accessed 13/04 2018).  
9 7 28. Pan American Health Organisation. Strategy on Human Resources for Universal Access to  
10 8 Health and Universal Health Coverage. Washington DC: Pan American Health Organisation, 2017.  
11 9 29. Banks LM, Kuper H, Polack S. Poverty and disability in low- and middle-income countries: A  
12 10 systematic review. *PLOS ONE* 2017; **12**(12): e0189996.  
13 11 30. Marmot M. Just societies, health equity, and dignified lives: the PAHO Equity Commission.  
14 12 *The Lancet* 2018.  
15 13 31. World Health Organization. Primary Ear and Hearing Care Training Resource. 2006.  
16 14 [http://www.who.int/pbd/deafness/activities/hearing\\_care/basic.pdf?ua=1](http://www.who.int/pbd/deafness/activities/hearing_care/basic.pdf?ua=1) (accessed 25/05 2017).  
17 15 32. World Health Organization. World Hearing Forum. 2018. [http://www.who.int/deafness/world-](http://www.who.int/deafness/world-hearing-forum/en/)  
18 16 [hearing-forum/en/](http://www.who.int/deafness/world-hearing-forum/en/) (accessed 21/11 2018).

1  
2  
3  
4  
5  
6  
7  
8  
9  
10  
11  
12  
13  
14  
15  
16  
17  
18  
19  
20  
21  
22  
23  
24  
25  
26  
27  
28  
29  
30  
31  
32  
33  
34  
35  
36  
37  
38  
39  
40  
41  
42  
43  
44  
45  
46  
47

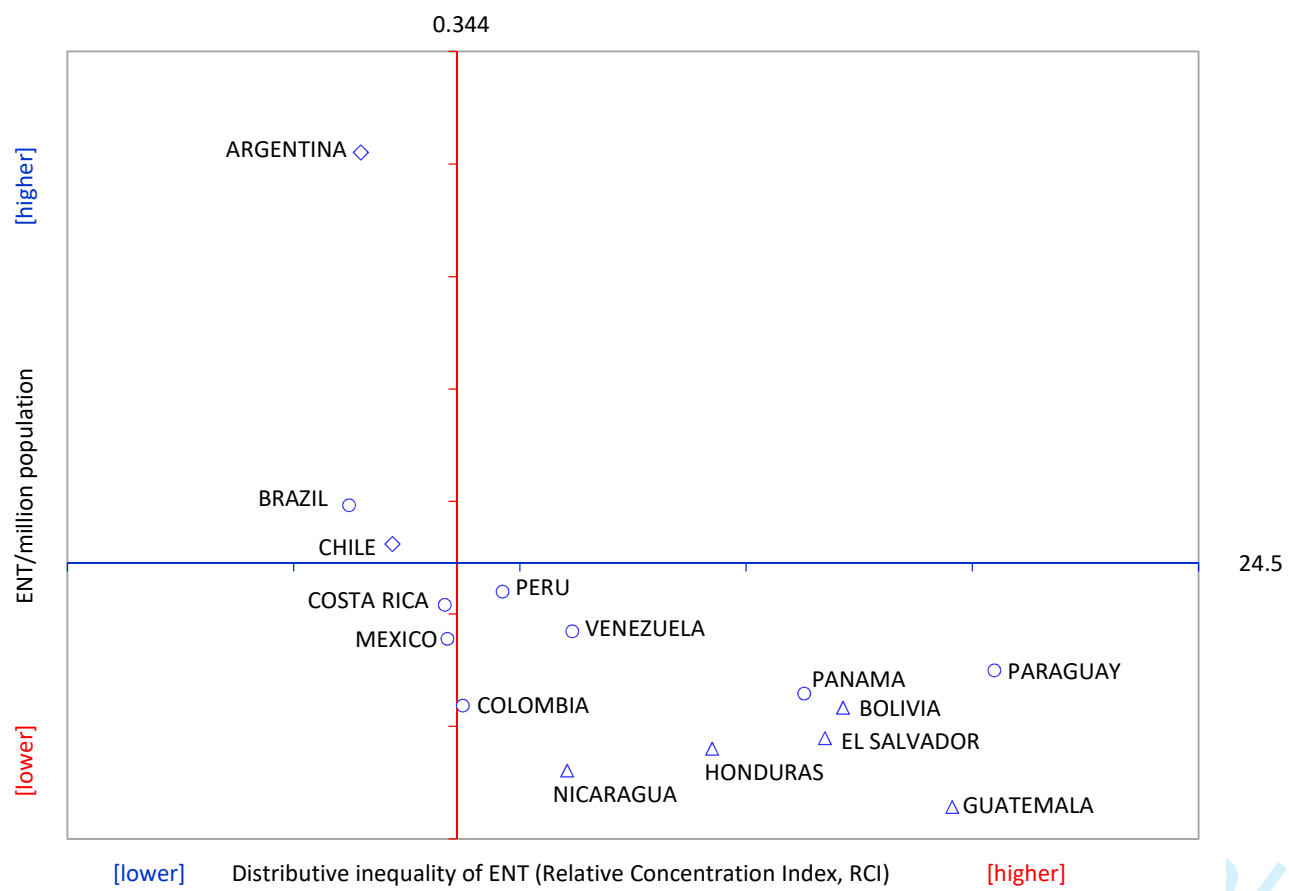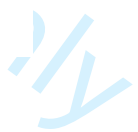

**Supplementary Figure 1: Concentration curves of distributive inequality of ENTs for 15 Latin American countries, 2017**



# BMJ Open

## Inequality in the distribution of Ear Nose and Throat specialists in 15 Latin American countries: an ecological study

|                                 |                                                                                                                                                                                                                                                                                                                                                                                                                                                                                                                                                                                                                                                                                                                                                                                                                                                                                       |
|---------------------------------|---------------------------------------------------------------------------------------------------------------------------------------------------------------------------------------------------------------------------------------------------------------------------------------------------------------------------------------------------------------------------------------------------------------------------------------------------------------------------------------------------------------------------------------------------------------------------------------------------------------------------------------------------------------------------------------------------------------------------------------------------------------------------------------------------------------------------------------------------------------------------------------|
| Journal:                        | <i>BMJ Open</i>                                                                                                                                                                                                                                                                                                                                                                                                                                                                                                                                                                                                                                                                                                                                                                                                                                                                       |
| Manuscript ID                   | bmjopen-2019-030220.R2                                                                                                                                                                                                                                                                                                                                                                                                                                                                                                                                                                                                                                                                                                                                                                                                                                                                |
| Article Type:                   | Research                                                                                                                                                                                                                                                                                                                                                                                                                                                                                                                                                                                                                                                                                                                                                                                                                                                                              |
| Date Submitted by the Author:   | 18-Jun-2019                                                                                                                                                                                                                                                                                                                                                                                                                                                                                                                                                                                                                                                                                                                                                                                                                                                                           |
| Complete List of Authors:       | Bright, Tess; London School of Hygiene & Tropical Medicine, CRD<br>Mújica, Oscar; Pan American Health Organization, PAHO/WHO,<br>Intelligence for Action in Health<br>Ramke, Jacqueline; LSHTM,<br>Moreno, Claudia; Pan American Health Organization<br>Der, Carolina ; Clínica Alemana de Santiago, Facultad de Medicina<br>Universidad del Desarrollo<br>Melendez, Amarilis; Hospital Santo Tomas<br>Lara Ovares, Ericka; University of Minnesota , School of Public Health<br>Sandoval Domingues, Edgar; Instituto de Seguridad y Servicios Sociales<br>de los Trabajadores del Estado<br>Santana Hernandez, Diego Jose; CBM Christoffel-Blindenmission<br>Chadha, Shelly; The World Health Organization , WHO Programme for<br>Prevention of Deafness and Hearing Loss<br>Silva, Juan Carlos; Pan American Health Organization<br>Penaranda, Augusto; Fundacion Santafe de Bogota |
| <b>Primary Subject Heading</b>: | Ear, nose and throat/otolaryngology                                                                                                                                                                                                                                                                                                                                                                                                                                                                                                                                                                                                                                                                                                                                                                                                                                                   |
| Secondary Subject Heading:      | Health services research                                                                                                                                                                                                                                                                                                                                                                                                                                                                                                                                                                                                                                                                                                                                                                                                                                                              |
| Keywords:                       | Health policy < HEALTH SERVICES ADMINISTRATION & MANAGEMENT,<br>Organisation of health services < HEALTH SERVICES ADMINISTRATION<br>& MANAGEMENT, OTOLARYNGOLOGY, Health equity                                                                                                                                                                                                                                                                                                                                                                                                                                                                                                                                                                                                                                                                                                       |
|                                 |                                                                                                                                                                                                                                                                                                                                                                                                                                                                                                                                                                                                                                                                                                                                                                                                                                                                                       |

SCHOLARONE™  
Manuscripts

1  
2  
3 1 **Title: Inequality in the distribution of Ear Nose and Throat specialists in 15**  
4  
5 2 **Latin American countries: an ecological study**

6  
7 3 **Authors:** Tess Bright<sup>1</sup>, Oscar J Mujica<sup>2</sup>, Jacqueline Ramke<sup>1</sup>, Claudia M Moreno<sup>2</sup>,  
8  
9 4 Carolina Der<sup>3</sup>, Amarilis Melendez<sup>4</sup>, Ericka Lara Ovares<sup>5</sup>, Edgar Ivan Sandoval  
10  
11 5 Domingues<sup>6</sup>, Diego Jose Santana Hernandez<sup>7</sup> Shelly Chadha<sup>9</sup>, Juan C Silva<sup>2</sup> and  
12  
13 6 Augusto Peñaranda<sup>8</sup>

14  
15 7  
16  
17 8 **Affiliations**

- 19  
20 9 1) International Centre for Evidence in Disability, London School of Hygiene &  
21  
22 10 Tropical Medicine, Keppel St, London, WC1 E7HT  
23  
24 11 2) Pan American Health Organization, PAHO/WHO, Washington DC USA  
25  
26 12 3) Clínica Alemana de Santiago, Facultad de Medicina Universidad del  
27  
28 13 Desarrollo, Santiago, Chile.  
29  
30 14 4) Hospital Santo Tomas, Ciudad de Panamá, Panamá  
31  
32 15 5) University of Minnesota, School of Public Health, Minneapolis, Minnesota  
33  
34 16 55455, USA  
35  
36 17 6) Instituto de Seguridad y Servicios Sociales de los Trabajadores del Estado,  
37  
38 18 Morelos; México  
39  
40 19 7) CBM Christoffel-Blindenmission Christian Blind Mission e.V Stubenwald Alle  
41  
42 20 5, 64625, Bensheim, Germany  
43  
44 21 8) Interamerican Association of Paediatric Otorhinolaryngology, Bogota,  
45  
46 22 Colombia  
47  
48 23 9) Management of Noncommunicable Diseases, Disability, Violence and Injury  
49  
50 24 Prevention, World Health Organization, avenue Appia 20, 1211 Geneva 27,  
51  
52 25 Switzerland

53  
54  
55  
56  
57  
58  
59  
60  
27 **Corresponding author:** Jacqueline Ramke [Jacqueline.Ramke@lshtm.ac.uk](mailto:Jacqueline.Ramke@lshtm.ac.uk)

## 1 **Abstract**

2 **Objective:** To explore socio-geographic inequalities in the availability and  
3 distribution of Ear Nose and Throat specialists (ENTs) in 15 Latin American (LA)  
4 countries.

5 **Design:** Ecological

6 **Setting:** Spanish and Portuguese speaking countries of Latin America

7 The number of registered ENTs in 2017 were obtained from the National ENT  
8 Society in each country.

9 **Outcome measures:** The ENT rate/million population was calculated at the national  
10 and sub-national (e.g. state) level. Three measures were calculated to assess sub-  
11 national distributive inequality of ENTs: i) absolute and ii) relative index of  
12 dissimilarity; and iii) concentration index (using the Human Development Index as  
13 the equity stratifier). Finally, the ratio of ENTs/million population in the capital area  
14 compared to the rest of the country was calculated.

15 **Results:** There was more than a 30-fold difference in the number of ENTs/million  
16 population across the included countries—from 61.0 in Argentina (95% Confidence  
17 Interval (CI) 58.7–63.4) to 2.8 in Guatemala (95%CI 2.1–3.8). In all countries, ENTs  
18 were more prevalent in advantaged areas and in capital areas. To attain distributive  
19 equality, Paraguay would need to redistribute the greatest proportion of its ENT  
20 workforce (67.3%; 95%CI 57.8–75.6) and Brazil the least (18.5%; 95%CI 17.6–19.5).

21 **Conclusions:** There is high inequality in the number and distribution of ENTs  
22 between and within the 15 studied countries in Latin America. This evidence can be  
23 used to inform policies that improve access to ear and hearing services in the region,  
24 such as scale-up of training of ENTs and incentives to distribute specialists equally.  
25 These actions to reduce inequities, alongside addressing the social determinants of  
26 ear and hearing health, are essential to realise Universal Health Coverage.

27

## Strengths and limitations of this study

- This is the first regional-level analysis on the availability and distribution of ENT specialists in Latin America, and includes 15 of the 17 Spanish or Portuguese-speaking countries.
- The three inequality measures used to assess subnational inequality—the relative concentration index, the absolute index of dissimilarity and the relative index of dissimilarity—take into account the entire population and are population-weighted, thus giving equal weight to each individual's access to ENTs.
- The data were obtained from national ENT societies, which may not be representative of all available ENTs, as some ENTs may not be society-affiliated.
- Data were not available on the distribution of ENTs in private vs public health services, so our results may overestimate the availability of ENTs for people without the resources to access the private sector.

## 1 Introduction

2 In 2018 there was an estimated 466 million people with disabling hearing loss, and  
3 over 80% of these reside in low and middle income countries (LMICs).<sup>1</sup> The World  
4 Health Organization (WHO) has estimated that by 2050 one in ten, or 900 million  
5 people, will experience disabling hearing loss unless substantial public health  
6 measures are implemented.<sup>1</sup> The predicted increase in prevalence can be attributed  
7 to the expected rise in global population, and global ageing.<sup>1</sup>

8 Consequently, there is a need for ear and hearing services, including surgical (e.g.  
9 Ear Nose and Throat specialists (ENTs)) and rehabilitative services (e.g.  
10 audiologists, and speech therapists), to meet the increasing demand. Indeed, in  
11 order to achieve Universal Health Coverage (UHC) for the millions of people with  
12 hearing loss globally, equitable access to effective, high quality and affordable ear  
13 and hearing services is vital. However, access to these services is extremely low in  
14 LMICs,<sup>2</sup> due to a dearth of human resources.<sup>3,4</sup>

15 Latin America (LA) has a combined population of 600 million people, approximately  
16 42 million (7%) of whom are estimated to have disabling hearing loss.<sup>1,5</sup> Countries  
17 within LA are highly diverse in terms of their historical, economic, political, and  
18 sociocultural contexts.<sup>6</sup> As an example, the GDP per capita in Chile is \$15,346, more  
19 than three times as much as Guatemala (\$4,470).<sup>6,7</sup> These vast economic  
20 differences have shaped health systems reforms in the region and efforts to achieve  
21 UHC.<sup>6,8</sup> As a consequence, countries in the region show variation in terms of human  
22 resource shortages for health care.<sup>9</sup> Previous research has found substantial  
23 shortages in the number of ENTs in 50% of LA countries.<sup>10</sup> Other professionals  
24 involved in ear and hearing care services, such as audiologists and speech  
25 therapists, are in even shorter supply.<sup>11</sup> There is also some evidence that within  
26 countries, ENTs are unequally distributed, with a higher concentration in urban  
27 compared to rural areas.<sup>12</sup> However, these inequities have not been examined in  
28 depth.

29 This study aimed to explore socio-geographic inequalities in the availability and  
30 distribution of ENTs both within and between 15 LA countries. The study  
31 hypothesised that regional variation in the availability of ENT specialists per million  
32 population exists. Within countries, ENT specialists were hypothesised to be



1  
2  
3 1 unequally distributed across sub-national regions, with the majority concentrated in  
4 2 areas of higher human development.

### 3 **Methods**

4 This is an ecological study that assesses the distributive inequality of ENT specialists  
5 in 15 countries in LA using standard measures of disproportionality across sub-  
6 national social gradients (defined by Human Development Indices). Ethical approval  
7 was not sought for this study, which used publicly available population data with  
8 organisational practitioner data.

### 9 **Data sources**

#### 10 *Population*

11 This paper focuses on the Spanish and Portuguese speaking countries of LA, of  
12 which there are 17. All LA countries were invited to participate, and 15 responded.  
13 The 15 included countries consist of 294 first-order sub-national units (e.g.  
14 department, province, state). Population data for these units were obtained from the  
15 national institutes of census and statistics of each country. The combined population  
16 of the included countries represent 96.7% of people in the LA Spanish and  
17 Portuguese speaking countries, and 88.2% of the total Latin America and the  
18 Caribbean regional population in 2017.<sup>13</sup>

#### 19 *Personnel*

20 Although ENT specialists alone do not capture the full complement of ear and  
21 hearing services necessary to treat and manage hearing loss, they were chosen as a  
22 key indicator to measure inequalities in access to ear and hearing services. An “ENT  
23 specialist” is defined for the purposes of this paper as a medical doctor who has  
24 been trained in the management of ear, nose and throat conditions, through a  
25 recognised degree.<sup>4</sup> Hereafter we refer to ENT specialists as ENTs.

26 In each country, data on the number ENTs registered at each of the sub-national  
27 units in 2017 were obtained from the National Society of ENTs. Societies were  
28 contacted by the Interamerican Association of Paediatric Otorhinolaryngology (IAPO)  
29 or study authors, either by phone or email. Society membership requires a medical

1 degree, completion of residency at an accredited medical school, and a national  
2 practice license.

### 3 *Human Development Index*

4 The Human Development Index (HDI) was used as the equity stratifier of the sub-  
5 national units. The HDI is widely used by the United Nations Development  
6 Programme (UNDP) as a composite measure of achievement in three key  
7 dimensions of human development—health, education, and standard of living.<sup>14</sup> The  
8 HDI score is a value between zero and one which represents the geometric mean of  
9 the index of the three dimensions.<sup>14</sup> The most recent HDI for the sub-national units of  
10 each country were obtained from UNDP reports from each country. To create the  
11 social gradient, within each country, sub-national units were ordered from lowest HDI  
12 (most socially disadvantaged) to highest HDI (most socially advantaged).

## 13 **Analysis**

### 14 *Availability of ENT personnel*

15 The number of ENTs/million population was calculated for each sub-national unit of  
16 each country. The mean and 95% confidence interval (CI) of ENTs/million population  
17 at the national level were calculated.

### 18 *Inequality measures*

19 Inequality in the distribution of ENTs was assessed using three common indicators of  
20 health inequality<sup>15,16,17</sup>:

- 21 • Relative concentration index (RCI)

22 The RCI is a relative measure of gradient inequality that indicates the extent to  
23 which a health indicator is concentrated among the disadvantaged or the  
24 advantaged.<sup>17</sup> In this analysis the RCI measures the extent to which the ENT  
25 distribution across sub-national units is systematically associated with the social  
26 advantage of each sub-national unit (measured by HDI). RCI takes a value between  
27 -1 and 1, with 0 indicating no inequality (i.e., equal distribution). A negative value of  
28 RCI indicates ENTs are concentrated among more disadvantaged sub-national  
29 units, and a positive value indicates ENTs are concentrated among more advantaged  
30 sub-national units.

1  
2  
3 1 The RCI was calculated for each country using non-linear optimization to fit a  
4 Lorenz concentration curve and calculating the area under the curve.<sup>18</sup> The  
5 2 curve equation fit the observed cumulative proportion of the population (as  
6 3 ranked by the HDI of each sub-national unit) against the cumulative proportion of  
7 4 ENTs.  
8 5

9  
10  
11  
12 6 • Absolute index of dissimilarity (aID)

13  
14 7 The aID quantifies the number of ENTs within a given country who would need to  
15 8 be redistributed for the national rate of ENTs/million population to be achieved in  
16 9 each sub-national unit i.e. equitable distribution. The aID is half the sum of the  
17 10 absolute value of the differences between the national average ENTs and the  
18 11 number of ENTs observed in each unit.

19  
20  
21  
22  
23 12 • Relative index of dissimilarity (rID)

24  
25 13 The rID is the relative equivalent of the aID, representing the percentage of ENTs  
26 14 who would have to be redistributed to achieve equitable sub-national distribution.  
27 15 The rID is computed by dividing the aID by the total number of ENTs  
28 16 available.<sup>15,18</sup> The closer rID is to 100%, the greater the inequality.  
29  
30  
31  
32  
33

34 18 *Regional benchmarking*

35  
36 19 WHO recommends benchmarking within regions to understand one country's level of  
37 20 inequality in relation to others.<sup>17</sup> To benchmark ENT distribution in LA we calculated  
38 21 the regional weighted mean of ENTs/million population and the regional distributional  
39 22 inequality (measured by the RCI). We used these regional averages to construct a  
40 23 framework<sup>19</sup> with four quadrants and mapped each country based on whether its  
41 24 ENT rate and RCI were higher or lower than the regional average. The HDI level of  
42 25 each country<sup>20</sup> was also indicated.  
43  
44  
45  
46  
47  
48

49 26 *Urban concentration*

50  
51 27 To assess the extent of urban concentration of ENTs, the ENTs/million population in  
52 28 the capital area for each country (i.e. the sub-national unit that contains the  
53 29 constitutional capital or the seat of government city), as compared to the rate in the  
54 30 rest of the country combined (i.e. all sub-national units apart from the capital area).  
55 31 The ratio of ENTs/million population in the capital compared to the rest of the country  
56 32 was calculated.  
57  
58  
59  
60

1  
2  
3  
4 1  
5 2 All statistical analyses were performed in MS Excel Solver and ToolPak add-ins  
6 3 (Microsoft Corp., Redmond, Washington, USA), using a semiautomated analytical  
7 4 template tool developed by the Pan American Health Organization (PAHO) for  
8 5 exploratory data analysis of social inequalities in health. Uncertainty was ascertained  
9 6 by computing 95% CIs for all summary measures of health inequality as well as the  
10 7 mean number of ENTs/million population.  
11  
12  
13  
14  
15  
16 8

## 17 18 9 **Results**

### 19 20 21 10 *Between country inequality*

22  
23 11 In these 15 LA countries, there was large variation in the size of the ENT profession,  
24 12 the rate of ENTs/million population and the distributive inequality (Table 1). For  
25 13 example, Brazil had 6,159 registered ENTs while Nicaragua had only 38. When the  
26 14 population size was taken into account, there was a more than a 30-fold difference in  
27 15 the number of ENTs/million population—from 61.0 in Argentina (95%CI 58.7–63.4) to  
28 16 2.8 in Guatemala (95%CI 2.1–3.8) (Table 1). There was also large variation in  
29 17 distributive inequality. In all countries ENTs were more prevalent in advantaged  
30 18 areas but the extent of this inequality varied greatly—inequality was lowest in Brazil  
31 19 (RCI 0.249; 95%CI 0.133–0.365) and highest in Paraguay (RCI 0.819; 95%CI  
32 20 0.769–0.870) (supplementary figure 1).  
33  
34  
35  
36  
37  
38  
39  
40

### 41 21 Regional benchmarking

42  
43 22 The regional variation in the ENT rate and distributive inequality is depicted in Figure  
44 23 1. The high ENT rate in Argentina—more than twice as high as the rate in the next  
45 24 highest country—inflated the regional weighted mean of 24.5/million (95%CI 23.3–  
46 25 25.7) (Figure 1). Brazil and Chile were the only other countries to have an ENT rate  
47 26 higher than the regional average. These three countries also had lower distributive  
48 27 inequality than the regional average (RCI 0.344; 95%CI 0.227–0.460), placing them  
49 28 in the best performing, top left quadrant of Figure 1. In contrast, the countries in the  
50 29 bottom right quadrant had a lower ENT rate and higher inequality compared to the  
51 30 regional average, with Guatemala arguably furthest behind other countries in the  
52 31 region.  
53  
54  
55  
56  
57  
58  
59  
60

1  
2  
3 1 The ENT rate tended to reflect the national HDI level. Countries with very high HDI  
4 had the highest ENT rate, followed by countries with high HDI, and then countries  
5 with medium HDI tending to have the lowest ENT rate. Distributive inequality was  
6 similar with two exceptions—Paraguay and Panama are high HDI countries but had  
7 distributive inequality more equivalent to countries of medium HDI (Figure 1).  
8  
9  
10  
11  
12

### 13 *Within country inequality*

14  
15 7 The redistributive potential to achieve equality mirrored the RCI results, with Brazil  
16 needing to redistribute the lowest proportion of their ENTs to achieve distributive  
17 equality (rID 18.5%; 95%CI 17.6–19.5) and Paraguay the highest (rID 67.3%; 95%CI  
18 57.8–75.6) (Table 1). Due to the size of the respective workforce, this equates to  
19 redistributing 1,142 ENTs in Brazil and 70 in Paraguay (aID; Table 1).  
20  
21  
22  
23

### 24 Urban concentration

25  
26  
27 13 In all countries, even when the population size was taken into account, ENTs were more  
28 concentrated in capital areas (Table 2). Argentina fared best, but the ENT rate in the  
29 capital area remained over twice as high as the rest of the country (C:R ratio 2.3; 95%  
30 CI 2.1–2.5).  
31  
32  
33

34 17 The largest inequality between capital and other areas was seen in Paraguay (C:R ratio  
35 36.7; 95%CI 23.6–57.2), Venezuela (C:R ratio 15.2; 95%CI 12.9–17.9) and Panama  
36 (C:R ratio 15.1; 95%CI 4.7–48.5). The high C:R inequality observed in Paraguay and  
37 Venezuela was driven by high ENT rates in the capital. In turn, these rates were driven  
38 by the low proportion of the national population residing in the capital area (7.6% and  
39 6.6% respectively), combined with the majority of ENTs being located there (75.0% and  
40 51.9% respectively). In contrast, the high C:R inequality in Panama was driven by the  
41 very low ENT rates in the rest of the country, with only three of the country's 53 ENTs  
42 (5.7%) stationed outside the capital (Table 2).  
43  
44  
45  
46  
47  
48  
49  
50  
51  
52  
53  
54  
55  
56  
57  
58  
59  
60

26

1 **Table 1:** Distributive inequality of ENTs per million population in 15 Latin American countries, 2017

| Country       | Population <sup>a</sup> | Number of ENTs <sup>b</sup> | Number of sub-national units (e.g. states) <sup>a</sup> | ENTs per million population |           | Relative Concentration Index (RCI) <sup>c</sup> |              | Absolute index of dissimilarity |             | Relative index of dissimilarity |           |
|---------------|-------------------------|-----------------------------|---------------------------------------------------------|-----------------------------|-----------|-------------------------------------------------|--------------|---------------------------------|-------------|---------------------------------|-----------|
|               |                         |                             |                                                         | Mean                        | 95%CI     | Mean                                            | 95%CI        | Mean                            | 95%CI       | Mean (%)                        | 95%CI     |
| Argentina     | 44,044,811              | 2,688                       | 23                                                      | 61.0                        | 58.7-63.4 | 0.259                                           | 0.128-0.391  | 575                             | 534-618     | 21.4                            | 19.9-23.0 |
| Bolivia       | 11,145,770              | 130                         | 9                                                       | 11.7                        | 9.7-13.8  | 0.686                                           | 0.507-0.864  | 75                              | 64-86       | 57.7                            | 49.1-65.8 |
| Brazil        | 207,660,929             | 6,159                       | 27                                                      | 29.7                        | 28.9-30.4 | 0.249                                           | 0.133-0.365  | 1,142                           | 1,083-1,203 | 18.5                            | 17.6-19.5 |
| Chile         | 17,598,287              | 461                         | 13                                                      | 26.2                        | 23.9-28.7 | 0.287                                           | 0.058-0.517  | 115                             | 98-134      | 24.9                            | 21.2-29.1 |
| Colombia      | 49,291,609              | 584                         | 33                                                      | 11.8                        | 10.9-12.8 | 0.349                                           | 0.262-0.437  | 155                             | 135-177     | 26.5                            | 23.1-30.3 |
| Costa Rica    | 4,947,481               | 103                         | 7                                                       | 20.8                        | 17.0-25.2 | 0.334                                           | -0.065-0.732 | 35                              | 26-45       | 34.0                            | 25.6-43.6 |
| El Salvador   | 6,581,940               | 59                          | 14                                                      | 9.0                         | 6.8-11.6  | 0.670                                           | 0.546-0.794  | 34                              | 27-41       | 57.6                            | 44.9-69.4 |
| Guatemala     | 16,924,191              | 48                          | 22                                                      | 2.8                         | 2.1-3.8   | 0.782                                           | 0.749-0.816  | 32                              | 25-38       | 66.7                            | 52.5-78.3 |
| Honduras      | 8,866,351               | 71                          | 18                                                      | 8.0                         | 6.3-10.1  | 0.570                                           | 0.441-0.699  | 36                              | 28-44       | 50.7                            | 39.3-62.0 |
| Mexico        | 124,041,731             | 2,207                       | 32                                                      | 17.8                        | 17.1-18.6 | 0.336                                           | 0.238-0.433  | 631                             | 590-673     | 28.6                            | 26.7-30.5 |
| Nicaragua     | 6,262,703               | 38                          | 17                                                      | 6.1                         | 4.3-8.3   | 0.442                                           | 0.291-0.593  | 16                              | 11-22       | 42.1                            | 27.9-57.8 |
| Panama        | 4,098,135               | 53                          | 12                                                      | 12.9                        | 9.7-16.9  | 0.651                                           | 0.564-0.738  | 22                              | 16-29       | 41.5                            | 29.3-54.9 |
| Paraguay      | 6,941,905               | 104                         | 18                                                      | 15.0                        | 12.2-18.2 | 0.819                                           | 0.769-0.870  | 70                              | 60-79       | 67.3                            | 57.8-75.6 |
| Peru          | 29,381,884              | 646                         | 25                                                      | 22.0                        | 20.3-23.7 | 0.385                                           | 0.276-0.494  | 213                             | 190-237     | 33.0                            | 29.5-36.7 |
| Venezuela     | 31,428,916              | 580                         | 24                                                      | 18.5                        | 17.0-20.0 | 0.446                                           | 0.307-0.586  | 275                             | 252-299     | 47.4                            | 43.4-51.5 |
| All countries | 569,216,643             | 13,931                      | 294                                                     | 24.5                        | 23.3-25.7 | 0.344                                           | 0.227-0.460  | 3,426                           | 3,139-3,725 | 28.5                            | 25.5-31.5 |

27 *ENT: Ear nose and throat specialist*

28 *a Source: National Institute of Statistics      b Source: National Society of ENTs*

29 *c The Relative Concentration Index departs from equity for all countries, except Costa Rica (i.e. the confidence intervals do not overlap with zero)*

1 **Table 2:** Number of ENTs per million population in the capital area compared to the rest of the country in 15 Latin American countries, 2017

| Country     | ENTs per million population |             |                 |           | Ratio of ENT rate<br>Capital: Rest-of-country<br>(C:R ratio) |           | Proportion of<br>population in<br>Capital area<br>(%) <sup>a</sup> | Proportion of<br>ENTs in Capital<br>area<br>(%) <sup>b</sup> | Capital area description     |
|-------------|-----------------------------|-------------|-----------------|-----------|--------------------------------------------------------------|-----------|--------------------------------------------------------------------|--------------------------------------------------------------|------------------------------|
|             | Capital area                |             | Rest-of-country |           | Mean                                                         | 95%CI     |                                                                    |                                                              |                              |
|             | Mean                        | 95%CI       | Mean            | 95%CI     |                                                              |           |                                                                    |                                                              |                              |
| Argentina   | 88.1                        | 84.0-92.3   | 38.4            | 35.9-40.9 | 2.3                                                          | 2.1-2.5   | 45.6%                                                              | 65.8%                                                        | Buenos Aires Autonomous City |
| Bolivia     | 37.7                        | 31.0-45.6   | 2.7             | 1.7-4.0   | 14.2                                                         | 9.0-22.5  | 25.7%                                                              | 83.1%                                                        | La Paz Department            |
| Brazil      | 67.8                        | 58.8-77.7   | 29.1            | 28.4-29.8 | 2.3                                                          | 2.0-2.7   | 1.5%                                                               | 3.3%                                                         | Federal District             |
| Chile       | 42.3                        | 37.7-47.4   | 15.3            | 13.0-17.8 | 2.8                                                          | 2.3-3.4   | 40.4%                                                              | 65.3%                                                        | Metropolitan Region          |
| Colombia    | 26.7                        | 23.3-30.5   | 8.9             | 8.0-9.9   | 3.0                                                          | 2.5-3.5   | 16.4%                                                              | 37.0%                                                        | Bogota Capital District      |
| Costa Rica  | 42.6                        | 33.1-53.9   | 10.2            | 7.1-14.3  | 4.2                                                          | 2.8-6.3   | 32.8%                                                              | 67.0%                                                        | San Jose Province            |
| El Salvador | 28.0                        | 20.8-36.9   | 1.9             | 0.9-3.6   | 14.9                                                         | 7.3-30.3  | 27.1%                                                              | 84.7%                                                        | San Salvador Department      |
| Guatemala   | 11.0                        | 7.8-15.1    | 0.7             | 0.4-1.4   | 14.9                                                         | 7.4-29.8  | 20.4%                                                              | 79.2%                                                        | Guatemala Department         |
| Honduras    | 24.4                        | 17.3-33.3   | 4.4             | 3.0-6.2   | 5.5                                                          | 3.5-8.8   | 18.1%                                                              | 54.9%                                                        | Francisco Morazan Department |
| Mexico      | 65.4                        | 60.3-70.9   | 14.0            | 13.4-14.7 | 4.7                                                          | 4.2-5.1   | 7.3%                                                               | 26.8%                                                        | Federal District             |
| Nicaragua   | 14.1                        | 8.8-21.6    | 3.6             | 2.1-5.7   | 4.0                                                          | 2.1-7.5   | 23.7%                                                              | 55.3%                                                        | Managua Department           |
| Panama      | 23.3                        | 17.3-30.7   | 1.5             | 0.3-4.5   | 15.1                                                         | 4.7-48.5  | 52.4%                                                              | 94.3%                                                        | Panama Province              |
| Paraguay    | 148.8                       | 117.6-185.7 | 4.1             | 2.6-5.9   | 36.7                                                         | 23.6-57.2 | 7.6%                                                               | 75.0%                                                        | Asuncion Capital City        |
| Peru        | 36.5                        | 32.7-40.5   | 15.1            | 13.4-16.9 | 2.4                                                          | 2.1-2.8   | 32.3%                                                              | 53.6%                                                        | Lima Department              |
| Venezuela   | 144.3                       | 128.5-161.6 | 9.5             | 8.4-10.7  | 15.2                                                         | 12.9-17.9 | 6.6%                                                               | 51.9%                                                        | Capital District             |

2 *ENT: Ear nose and throat specialist*3 *a Source: National Institute of Statistics*3 *b Source: National Society of ENTs*

## 1 Discussion

2 This study examined the socio-geographic distribution of ENTs between and within  
3 15 LA countries. We found that the availability of ENTs across countries of the region  
4 is highly variable. Within countries, the distribution was shown to be unequal, with  
5 more socially advantaged areas, and capital areas, having a higher concentration of  
6 ENT specialists. Despite inequality in countries such as Argentina, Brazil and Chile  
7 being up to three times lower than Paraguay and Guatemala, the RCI in all 15  
8 countries was at a level WHO considers a high level of relative inequality.<sup>17</sup> This high  
9 inequality was reinforced by the rID, which indicates between one in five ENTs in  
10 Brazil and two in three ENTs in Paraguay would need to be redistributed to attain  
11 socio-geographic equality.

12 The findings of this study concur with previous literature from both the LA region and  
13 elsewhere. Wagner et al. (2013) and Stolovitsy et al. (2018) also found that  
14 Guatemala had the poorest ratio of ENTs/100,000 population (4 per million), which  
15 was only 11% of the ratio in the United States.<sup>10,12</sup> Both studies also found the  
16 highest ratio was in Argentina (56 per million). These trends align with our findings,  
17 however we found a lower ratio in Guatemala and higher ratio in Argentina which  
18 may be explained by population increases, or increases in the numbers of ENTs  
19 respectively.<sup>10,12</sup> In 2001, Madriz and colleagues surveyed 15 countries in Latin  
20 American and the Caribbean to determine the resources available for hearing  
21 impairment, including prevalence data, training programmes, and equipment. They  
22 found Brazil (5000 ENTs), Argentina (3000 ENTs), and Mexico (2400 ENTs) had the  
23 greatest absolute numbers of human resources. Although the survey was published  
24 over 15 years ago, it appears that there has been little progress in human resource  
25 development since this study was conducted.<sup>11</sup> In fact, the number of ENTs in our  
26 study was lower in comparison for Argentina, Guatemala, and Mexico. This may be  
27 due to differences in data sources, with the 2001 survey using expert opinion across  
28 a range of institutions rather than National societal membership.<sup>11</sup> In 2012, the WHO  
29 conducted a global survey of availability of human resources to provide ear and  
30 hearing care. They demonstrated great variation in availability of ENTs, audiologists,  
31 and speech therapists globally, and a clear trend of increased availability with  
32 country-income group.<sup>4</sup>



1  
2  
3 1 Despite the trend in increased availability with national income, inequalities in access  
4 2 to services still exist within countries. Within country disparities in availability of ENTs  
5 3 have been less well documented. Westerburg et al. (2018) reports that the  
6 4 geographic distribution of ENTs in North America is inequitable, contributing to poor  
7 5 access for vulnerable populations.<sup>21</sup> In Canada, for example, the majority of  
8 6 providers are located in urban centres, and there are no providers at all in many  
9 7 areas where Aboriginal populations are concentrated.<sup>21</sup> The trends we found in this  
10 8 study have also been observed in eye health in the region. Hong et al. (2016) found  
11 9 that ophthalmologists are more concentrated in socially advantaged areas within  
12 10 countries.<sup>22</sup> However, comparisons to this study highlight that the low coverage of  
13 11 ENTs appears to be more pronounced than in eye health. For example in  
14 12 Venezuela, there are 42 ophthalmologists/million, whereas our analysis found a ratio  
15 13 of 18.5 ENTs/million. Thus, for every ENT in Venezuela there are two  
16 14 ophthalmologists. This is despite comparable burden of impairments (16%  
17 15 hearing; 18% vision).<sup>23</sup> The reasons for this difference could allow lessons to be  
18 16 drawn on improving ear and hearing services availability in the country. Compared to  
19 17 ophthalmologists, ENTs in LA also tend to be less equally distributed. There are  
20 18 several possible explanations for this, including the lack of population-based data on  
21 19 need for services, and lack of funding, leading to ear and hearing care not being  
22 20 prioritised by the regional governments.<sup>24</sup> The reasons for the concentration of ENTs  
23 21 in more socially advantaged areas likely include better availability of equipment,  
24 22 facilities, and specialist training centres.

25  
26  
27  
28  
29  
30  
31  
32  
33  
34  
35  
36  
37  
38  
39  
40  
41  
42 23 This study has several strengths. Although previous literature has examined  
43 24 numbers of ENTs per population and made comparisons across countries, there has  
44 25 been limited analysis of inequalities within countries. This study adds to the  
45 26 knowledge base by performing a robust, more in-depth analysis of the substantial  
46 27 sub-national inequalities that exist. The three inequality measures used in this  
47 28 analysis take into account the entire population and are population-weighted, thus  
48 29 giving equal weight to each individual's access to ENTs.<sup>16,25</sup> These strengths—along  
49 30 with reflecting the socioeconomic dimension to health inequality—are why WHO  
50 31 recommends the concentration index as a measure of relative inequality.<sup>26</sup> The data  
51 32 coverage of this study was high, representing 96.7% of the LA Spanish and  
52 33 Portuguese speaking countries.

1  
2  
3 1 There are also limitations which should be taken into account when interpreting the  
4 results. The data were obtained from national ENT societies, which may not be  
5 2 representative of all available ENTs within the countries studied as some ENTs may  
6 3 not be society-affiliated. Although ENT specialists are an essential component of  
7 4 functioning ear and hearing care programmes, there are also many other  
8 5 professionals involved in provision of specialist care for hearing loss and ear  
9 6 disease, for instance, audiologists and speech therapists. Further, data on the  
10 7 availability of equipment to enable service provision is not provided. In addition, we  
11 8 have assumed that ENTs in LMICs deliver the full range of ear and hearing services.  
12 9 However, it is possible that some ENT specialists are subspecialised and provide  
13 10 services for only one of ears, nose or throat. The data also do not capture more  
14 11 nuanced service delivery models common in LMICs, such as surgical outreach to  
15 12 primary and secondary care facilities or telemedicine. This is an area of future  
16 13 research need. Finally, data were not available on the distribution of ENTs in private  
17 14 vs public health services which has an impact on the financial accessibility of the  
18 15 service. Thus, we are unable to draw conclusions on the availability full complement  
19 16 of ear and hearing services.  
20 17

21 18 While not a limitation of our study, we acknowledge that distribution of personnel is  
22 19 only one aspect of access to hearing care. Productivity of these personnel, as well  
23 20 as the quality and costs of hearing services are also important components that  
24 21 require attention to realise universal hearing care.<sup>27</sup>

25 22 This study provides evidence for policy makers to further develop programmes that  
26 23 increase the number of ENTs/million population as well as reduce the inequities in  
27 24 their distribution. The Pan American Health Organisation (PAHO), the regional WHO  
28 25 office for the Americas, has developed a strategy to guide national policies on  
29 26 addressing human resource deficiencies.<sup>28</sup> Some of the key strategies outlined  
30 27 include strengthening governance and leadership, focussing on the number and  
31 28 distribution of personnel according to health needs; partnership with other relevant  
32 29 sectors, such as education, in order to respond to training needs across geographic  
33 30 regions; and implementing staff retention strategies, such as incentives and  
34 31 improved infrastructure.<sup>28</sup> We acknowledge there is no definitive 'right' number of  
35 32 ENTs/ million population, and instead countries must consider all of these elements.  
36 33 Access to health is required to achieve good health outcomes, however in

1  
2  
3 1 addressing health inequities, actions must also be taken to address the social  
4 2 determinants of health. As an example, hearing loss and ear disease are linked to  
5 3 poverty, and thus to address the greater burden amongst the poor, a multi-faceted  
6 4 approach is required – beyond a focus on human resource development alone.<sup>29,30</sup>

7  
8  
9  
10 5 Further research is needed to understand the availability and inequities in distribution  
11 6 of other health professionals relevant to ear and hearing care, including audiologists,  
12 7 and speech therapists, as well as mid-cadre and primary health professionals such  
13 8 as clinical officers that exist in many LMICs. Training primary health workers in ear  
14 9 and hearing care has been a key strategy supported by the WHO in order to address  
15 10 the lack of human resources and improve access to services at the community level,  
16 11 in efforts to achieve universal ear and hearing care.<sup>27,31</sup> There is also a need to  
17 12 examine availability of equipment, and other essential elements of service provision.  
18 13 Although this study presents a clear picture of inequalities in distribution of  
19 14 specialists, the need for services is not well understood. There have been very few  
20 15 population-based surveys to determine the prevalence and causes of hearing loss in  
21 16 LA. In LA, there have been three published studies, two of which were in Brazil, and  
22 17 one in Ecuador.<sup>24</sup> Prevalence data are required to plan services according to the  
23 18 population need, including the required number and distribution of specialists.  
24 19 Although global Vision 2020 targets of ophthalmologists per population are  
25 20 contested, they have been used as an advocacy tool to lobby governments for  
26 21 increased resources for eye care. Thus, similar evidence-based targets should be  
27 22 developed for the field of ear and hearing. Vision 2020 has helped garner action to  
28 23 reduce avoidable causes of blindness, at a global and local scale. A similar global  
29 24 initiative for ear and hearing care has been launched in 2018, the World Hearing  
30 25 Forum, which aims to stimulate action and make gains similar to those attained in  
31 26 eye health.<sup>32</sup>

## 27 **Conclusion**

28 This study provides evidence that the availability and distribution of ENTs in LA  
29 30 countries is highly inequitable. A disproportionate number of ENTs are concentrated  
31 32 in more socially advantaged areas, such as capital cities. This evidence on health  
inequalities, with respect to access to ear and hearing services, can be used to  
support development of programmes and policies to increase the number and

1 distribution of ear and hearing professionals. Actions to reduce these inequities are  
2 essential for efforts towards achieving UHC.

### 3 4 5 6 7 8 9 10 11 **Figure Legend**

12 **Figure 1:** Availability and distributive inequality of ENT for 15 Latin American countries benchmarked  
13 against regional mean values, 2017

14  
15  
16 *Source of population data: National Institute of Statistics*      *Source of ENT data: National Society of ENTs*

17  
18 *Source of HDI of each country: UNDP 2018<sup>20</sup>*

19  
20  
21  
22  
23  
24  
25 **Acknowledgements:** The authors would like to thank the Interamerican Association  
26 of Paediatric Otorhinolaryngology-IAPO for their assistance in obtaining data for this  
27 study. JR is a Commonwealth Rutherford Fellow, funded by the UK government  
28 through the Commonwealth Scholarship Commission in the UK.

29  
30  
31  
32 **Competing interests:** None to declare.

33  
34 **Funding source:** Pan American Health Organization.

35  
36  
37 **Data sharing statement:** The data used in this study include (for the 15 countries):  
38 i) the number of members of national ENT societies at the national and subnational  
39 level; ii) the population distribution at the subnational level; and iii) the calculated  
40 inequality indices. These data are available on reasonable request from Dr Juan  
41 Carlos Silva ORCID ID: 0000-0003-4855-5008.

42  
43  
44  
45 **Patient and public involvement:** It was not appropriate or possible to involve  
46 patients or the public in this work.

47  
48  
49  
50  
51 **Author contribution:** JCS conceived of the study, facilitated access to data,  
52 interpreted findings and helped draft the manuscript. TB and JR interpreted data and  
53 drafted the manuscript. OM and CM conceived of the study, were responsible for  
54 data analysis and edited the manuscript. CD, AM, EL, ES, DS, SC and AP facilitated  
55 access to data and critically reviewed the manuscript. All authors read and approved  
56 the final manuscript.

## References

1. World Health Organization. Addressing the rising prevalence of hearing loss. Geneva: World Health Organization, 2018.
2. Bright T, Wallace S, Kuper H. A Systematic Review of Access to Rehabilitation for People with Disabilities in Low- and Middle-Income Countries. *International journal of environmental research and public health* 2018; **15**(10).
3. Mulwafu W, Ensink R, Kuper H, Fagan J. Survey of ENT services in sub-Saharan Africa: little progress between 2009 and 2015. *Global Health Action* 2017; **10**(1): 1289736.
4. World Health Organization. Multi-Country Assessment of National Capacity to Provide Hearing Care. 2013. [http://www.who.int/pbd/publications/WHOReportHearingCare\\_Englishweb.pdf](http://www.who.int/pbd/publications/WHOReportHearingCare_Englishweb.pdf) (accessed 16/05 2017).
5. The World Bank. The World Bank Open Data. 2018. <https://data.worldbank.org/> (accessed 28/11 2018).
6. Atun R, de Andrade LOM, Almeida G, et al. Health-system reform and universal health coverage in Latin America. *The Lancet* 2015; **385**(9974): 1230-47.
7. World Bank. GDP per capita Latin America & Caribbean. 2018. <https://data.worldbank.org/indicator/NY.GDP.PCAP.CD?locations=ZJ-CL> (accessed 19/11 2018).
8. Frenk J, Gómez-Dantés O. Health Systems in Latin America: The Search for Universal Health Coverage. *Archives of Medical Research* 2018; **49**(2): 79-83.
9. Carpio C, Santiago Bench N. The Health Workforce in Latin America and the Caribbean: An Analysis of Colombia, Costa Rica, Jamaica, Panama, Peru, and Uruguay. . Washington DC: World Bank, 2015.
10. Stolovitzky JP, Alvarado J. Regional Overview of Specific Populations, Workforce Considerations, Training, and Diseases in Latin America. *Otolaryngol Clin North Am* 2018; **51**(3): 651-8.
11. Madriz JJ. Audiology in Latin America: hearing impairment, resources and services. *Scandinavian Audiology* 2009; **30**(2): 85-92.
12. Wagner R, Fagan J. Survey of otolaryngology services in Central America: need for a comprehensive intervention. *Otolaryngol Head Neck Surg* 2013; **149**(5): 674-8.
13. United Nations DoEaSA, Population Division,. World Population Prospects: The 2017 Revision, Key Findings and Advance Tables. Working Paper No. ESA/P/WP/248. New York: United Nations; 2017.
14. United Nations Development Program. Human Development Report 2015 Technical Notes. New York: UNDP; 2015.
15. Schneider MC, Castillo-Salgado C, Bacallao J, et al. Methods for measuring inequalities in health. *Rev Panam Salud Publica, Rev panam salud pública* 2002; **12**(6): 398-414.
16. Hosseinpoor AR, Bergen N, Barros AJD, Wong KLM, Boerma T, Victora CG. Monitoring subnational regional inequalities in health: measurement approaches and challenges. *International Journal for Equity in Health* 2016; **15**(1): 18.
17. World Health Organization. Handbook on health inequality monitoring with a special focus on low- and middle-income countries. Geneva: World Health Organization, 2013.
18. Wagstaff A, Van Doorslaer E, Paci P. On the measurement of horizontal inequity in the delivery of health care. *Journal of Health Economics* 1991; **10**(2): 169-205.
19. Minujin A, Delamonica E. Mind the gap! Widening child mortality disparities. *J Human Dev* 2003; **4**(3): 397-418.
20. United Nations Development Program. Human Development Indices and Indicators 2018 Statistical Update. New York: UNDP; 2018.
21. Westerberg BD, Lango MN. Otolaryngology-Related Disorders in Underserved Populations, Otolaryngology Training and Workforce Considerations in North America. *Otolaryngol Clin North Am* 2018; **51**(3): 685-95.
22. Hong H, Mujica OJ, Anaya J, Lansingh VC, Lopez E, Silva JC. The Challenge of Universal Eye Health in Latin America: distributive inequality of ophthalmologists in 14 countries. *BMJ Open* 2016; **6**(11): e012819.
23. Institute for Health Metrics and Evaluation. GBD Results Tool. 2017. <http://ghdx.healthdata.org/gbd-results-tool> (accessed 28/11 2018).
24. Stevens G, Flaxman S, Brunskill E, Mascarenhas M, Mathers CD, Finucane M. Global and regional hearing impairment prevalence: an analysis of 42 studies in 29 countries. *European Journal of Public Health* 2011; **23**(1): 146-52.

- 1  
2  
3 1 25. Wagstaff A, Paci P, van Doorslaer E. On the measurement of inequalities in health. *Social*  
4 2 *science & medicine (1982)* 1991; **33**(5): 545-57.  
5 3 26. World Health Organization. Handbook on health inequality monitoring with a special focus on  
6 4 low-and middle-income countries. Geneva: World Health Organization; 2013.  
7 5 27. World Health Organization. Universal health coverage and health financing. 2018.  
8 6 [http://www.who.int/health\\_financing/universal\\_coverage\\_definition/en/](http://www.who.int/health_financing/universal_coverage_definition/en/) (accessed 13/04 2018).  
9 7 28. Pan American Health Organisation. Strategy on Human Resources for Universal Access to  
10 8 Health and Universal Health Coverage. Washington DC: Pan American Health Organisation, 2017.  
11 9 29. Banks LM, Kuper H, Polack S. Poverty and disability in low- and middle-income countries: A  
12 10 systematic review. *PLOS ONE* 2017; **12**(12): e0189996.  
13 11 30. Marmot M. Just societies, health equity, and dignified lives: the PAHO Equity Commission.  
14 12 *The Lancet* 2018.  
15 13 31. World Health Organization. Primary Ear and Hearing Care Training Resource. 2006.  
16 14 [http://www.who.int/pbd/deafness/activities/hearing\\_care/basic.pdf?ua=1](http://www.who.int/pbd/deafness/activities/hearing_care/basic.pdf?ua=1) (accessed 25/05 2017).  
17 15 32. World Health Organization. World Hearing Forum. 2018. [http://www.who.int/deafness/world-](http://www.who.int/deafness/world-hearing-forum/en/)  
18 16 [hearing-forum/en/](http://www.who.int/deafness/world-hearing-forum/en/) (accessed 21/11 2018).

1  
2  
3  
4  
5  
6  
7  
8  
9  
10  
11  
12  
13  
14  
15  
16  
17  
18  
19  
20  
21  
22  
23  
24  
25  
26  
27  
28  
29  
30  
31  
32  
33  
34  
35  
36  
37  
38  
39  
40  
41  
42  
43  
44  
45  
46  
47

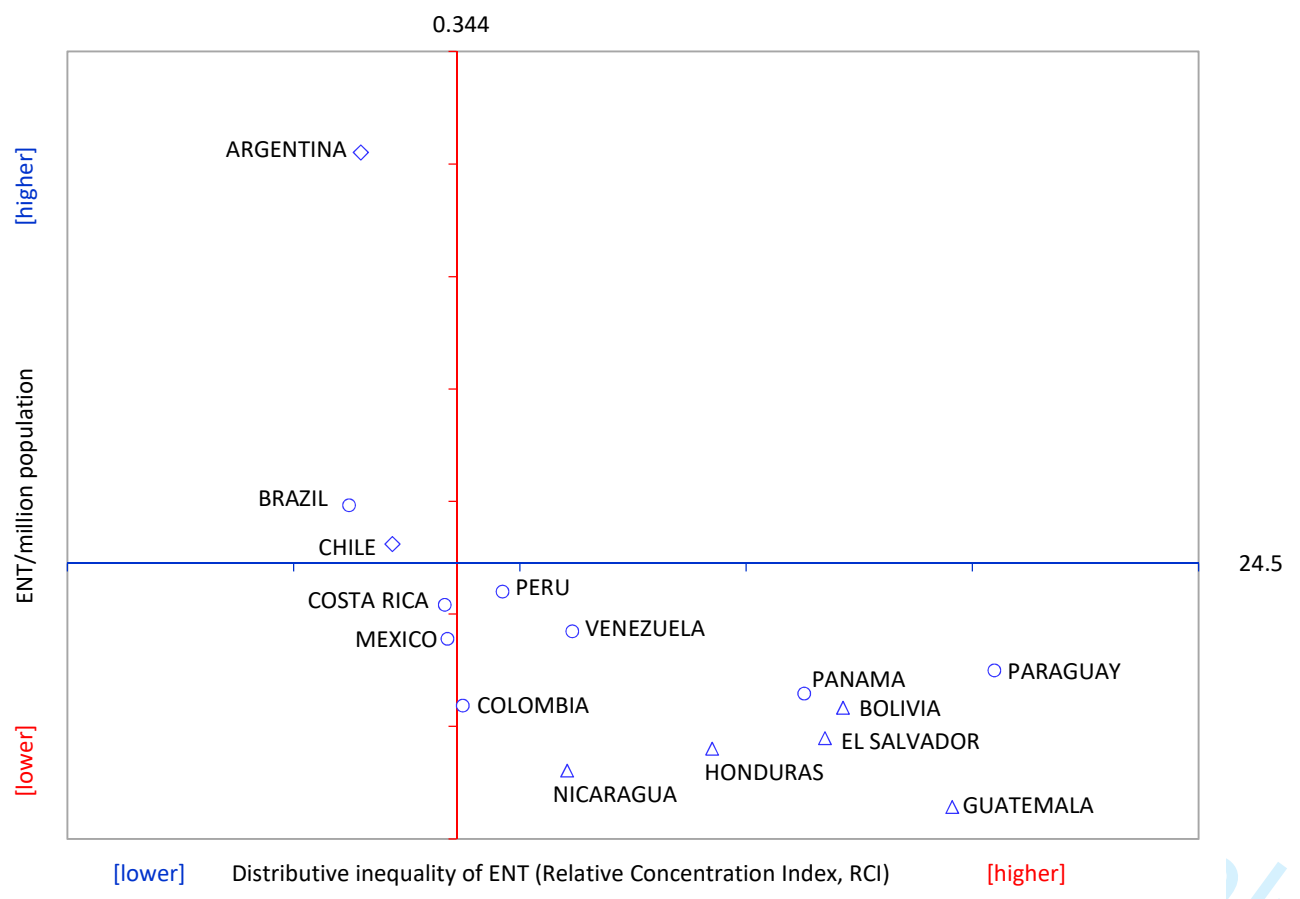

**Supplementary Figure 1: Concentration curves of distributive inequality of ENTs for 15 Latin American countries, 2017**



Supplement: bmjopen-2019-030220.draft_revisions.pdf [file bmjopen-2019-030220.draft_revisions.pdf]
