# Supplementary material for: Inequality in the distribution of ear, nose and throat specialists in 15 Latin American countries: an ecological study
Source: PubMed Central journal article supplement — BMJ Open. 2019 Jul 19;9(7):e030220. doi: 10.1136/bmjopen-2019-030220 (PMC6661698; doi:10.1136/bmjopen-2019-030220), 2019-07-19

**Supplementary Figure 1:** Concentration curves of distributive inequality of ENTs for 15 Latin American countries, 2017

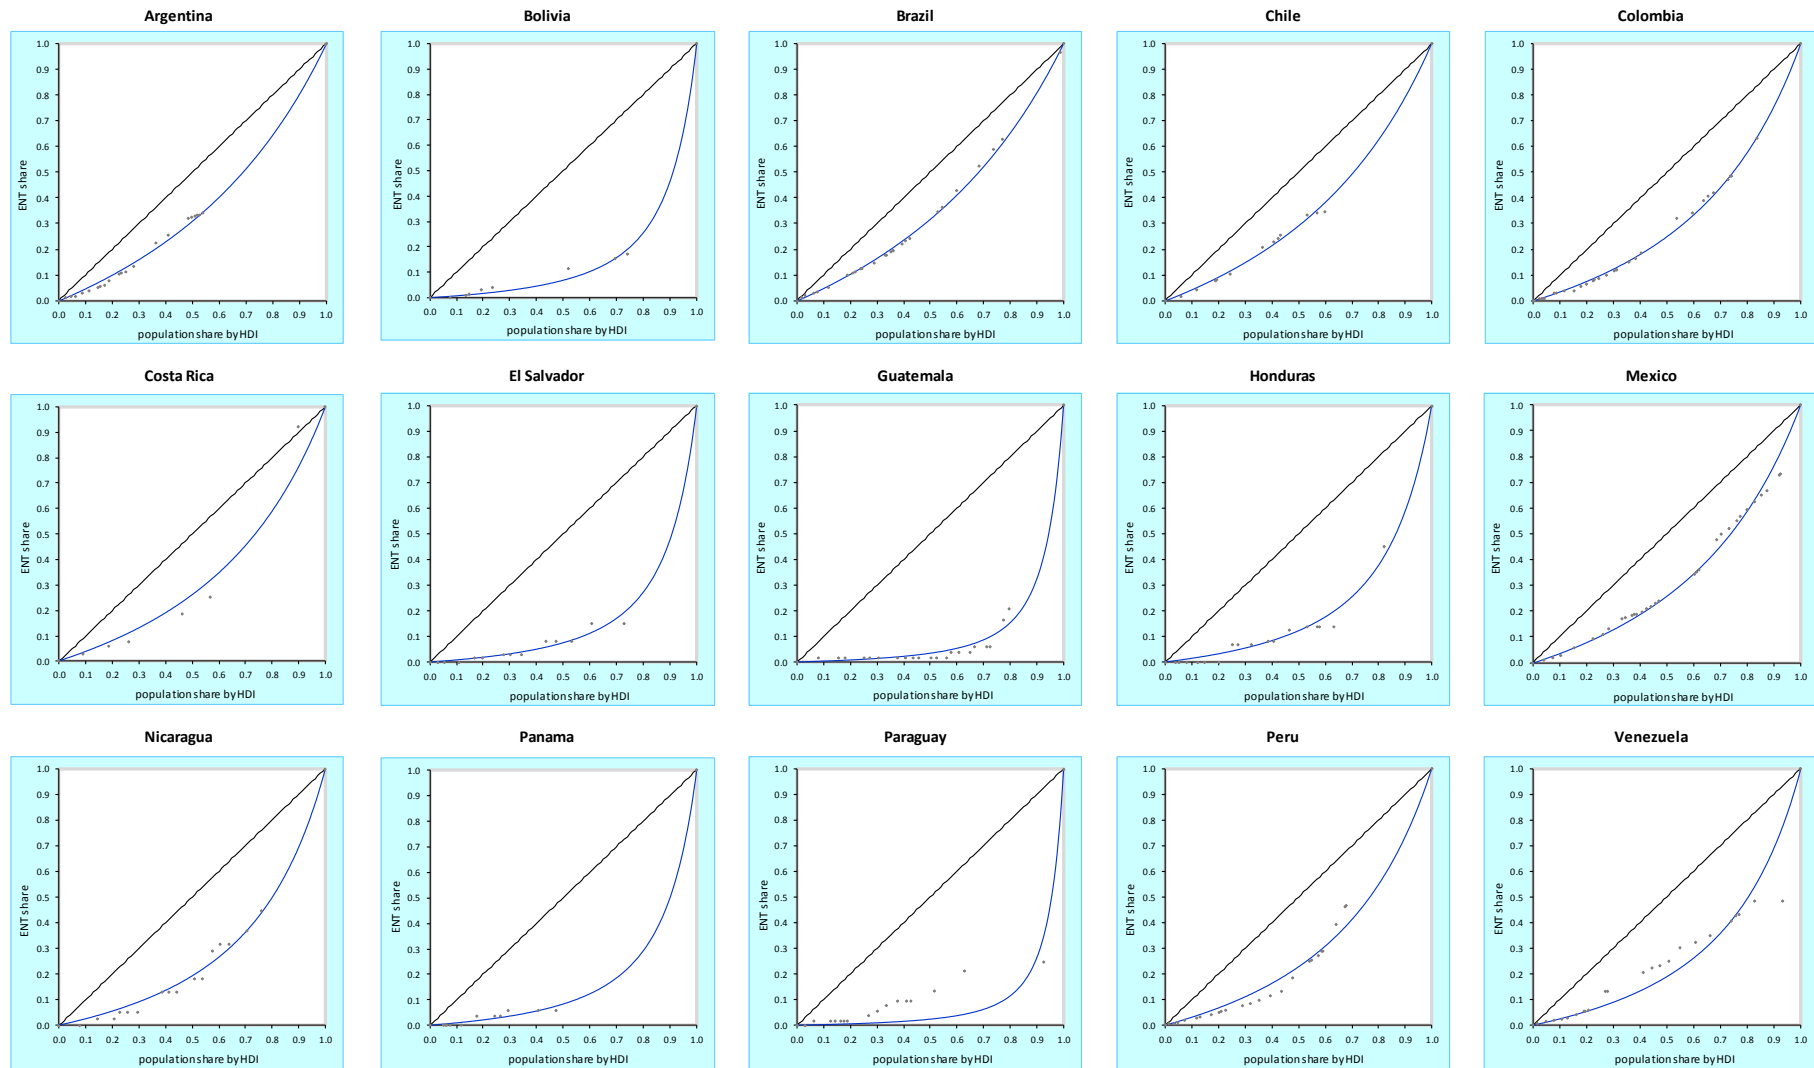

Supplement: bmjopen-2019-030220supp001.pdf [file bmjopen-2019-030220supp001.pdf]
